# Supplementary material for: Pitfalls in the structural elucidation of small molecules. A critical analysis of a decade of structural misassignments of marine natural products
Source: Royal Society of Chemistry journal article supplement (doi:10.1039/d2np00023g), 2022-01-01
Supplement: d2np00023g1.pdf [file d2np00023g1.pdf]

## Supporting Information

### **Pitfalls in the structural elucidation of small molecules. A critical analysis of a decade of structural missassignments of marine natural products**

Shou-Mao Shen,<sup>ab</sup> Giovanni Appendino<sup>c</sup> and Yue-Wei Guo<sup>\*ad</sup>

*<sup>a</sup> State Key Laboratory of Drug Research, Shanghai Institute of Materia Medica, Chinese Academy of Sciences, Shanghai 201203, China*

*<sup>b</sup> School of Chinese Materia Medica, Nanjing University of Chinese Medicine, Nanjing 210023, China*

*<sup>c</sup> Dipartimento di Scienze del Farmaco, Università degli Studi del Piemonte Orientale, Largo Donegani 2, 28100 Novara, Italy*

*<sup>d</sup> Drug Discovery Shandong Laboratory, Bohai Rim Advanced Research Institute for Drug Discovery, Yantai, Shandong 264117, China*

\*Corresponding author

*E-mail address: ywguo@simm.ac.cn*

## Contents

|                                                                                              |    |
|----------------------------------------------------------------------------------------------|----|
| <b>Table S1.</b> Wrong carbon-carbon connectivity assignment of MNPs (2010–2021).....        | 3  |
| <b>Table S2.</b> Wrong constitution of a heterocyclic ring scaffold of MNPs (2010–2021)..... | 5  |
| <b>Table S3.</b> Functional group misidentification of MNPs (2010–2021).....                 | 11 |
| <b>Table S4.</b> Functional group mispositioning of MNPs (2010–2021). ....                   | 13 |
| <b>Table S5.</b> Structural revisions of absolute configuration of MNPs (2010–2021). ....    | 16 |
| <b>Table S6.</b> Single stereocenter misidentification of MNPs (2010–2021).....              | 18 |
| <b>Table S7.</b> Multiple stereocenters misidentification of MNPs (2010–2021). ....          | 25 |
| <b>Table S8.</b> Structural revisions of double bond geometry of MNPs (2010–2021).....       | 33 |
| <b>References</b> .....                                                                      | 34 |

**Table S1.** Wrong carbon-carbon connectivity assignment of MNPs (2010–2021).

| no. | Proposed structure                                                                                                                                                                                                                                                                                                                                                                                                                                                                                                                                                                                                                                                                                                                                                   | Methods used in initial assignment                                                   | Revised structure                                                                                                                              | Basis for revision                                                                                             |
|-----|----------------------------------------------------------------------------------------------------------------------------------------------------------------------------------------------------------------------------------------------------------------------------------------------------------------------------------------------------------------------------------------------------------------------------------------------------------------------------------------------------------------------------------------------------------------------------------------------------------------------------------------------------------------------------------------------------------------------------------------------------------------------|--------------------------------------------------------------------------------------|------------------------------------------------------------------------------------------------------------------------------------------------|----------------------------------------------------------------------------------------------------------------|
| 1   | 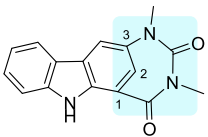 <p>antipathine A<sup>1</sup><br/>coral (2009)</p>                                                                                                                                                                                                                                                                                                                                                                                                                                                                                                                                                                                                                                  | HMBC                                                                                 |                                                              | total synthesis (2013) <sup>2</sup>                                                                            |
| 2   |  <p>(<i>S</i>)-2,2'-dimethoxy-1,1'-binaphthyl-5,5',6,6'-tetraol<sup>3</sup><br/>sponge (2007)</p>                                                                                                                                                                                                                                                                                                                                                                                                                                                                                                                                                                                   | HRESIMS;<br>NMR                                                                      |  <p>= 3,5-dibromo-2-(3,5-dibromo-2-methoxyphenoxy)phenol</p> | total synthesis;<br>X-ray;<br>re-evaluation<br>NMR and MS (2012) <sup>4</sup>                                  |
| 3   |  <p>2-methylimidazo[1,5-<i>b</i>]isoquinoline-1,3,5(2<i>H</i>)-trione<sup>5</sup><br/>fungus (2011)</p>                                                                                                                                                                                                                                                                                                                                                                                                                                                                                                                                                                             | EIMS;<br>NMR                                                                         |                                                              | total synthesis;<br>X-ray (2017) <sup>6</sup>                                                                  |
| 4   |  <p>ohmyungsamycin B<sup>7</sup><br/>bacterial strain (2013)</p>                                                                                                                                                                                                                                                                                                                                                                                                                                                                                                                                                                                                                  | NMR comparison;<br>2D NMR;<br>derivatization;<br>Marfey's method;<br>Mosher's method |                                                            | total synthesis (2018) <sup>8</sup>                                                                            |
| 5–8 |  <p>poecillastrin C<sup>10</sup>:<br/>R<sub>1</sub> = OMe, R<sub>2</sub> = R<sub>3</sub> = R<sub>4</sub> = R<sub>5</sub> = R<sub>6</sub> = H<br/>poecillastrin B<sup>10</sup>:<br/>R<sub>1</sub> = OMe, R<sub>2</sub> = R<sub>3</sub> = R<sub>5</sub> = R<sub>6</sub> = H, R<sub>4</sub> = Me<br/>poecillastrin D<sup>11</sup>:<br/>R<sub>1</sub> = OMe, R<sub>2</sub> = R<sub>4</sub> = R<sub>5</sub> = R<sub>6</sub> = H, R<sub>3</sub> = Me<br/>73-deoxychondropsin A<sup>12</sup>:<br/>R<sub>1</sub> = R<sub>3</sub> = R<sub>4</sub> = R<sub>5</sub> = H, R<sub>2</sub> = COCH<sub>2</sub>CH(OH)CO<sub>2</sub>H, R<sub>6</sub> = CO<sub>2</sub>Me<br/>sponge (2007, 2004)</p> | NMR comparison                                                                       |                                                            | re-evaluation<br>NMR;<br>acid hydrolysis;<br>chemical transformation;<br>Marfey's analysis (2017) <sup>9</sup> |

**Table S1 (continued)**

| no. | Proposed structure                                                                                                                          | Methods used in initial assignment                    | Revised structure                                                                                                     | Basis for revision                                                                                        |
|-----|---------------------------------------------------------------------------------------------------------------------------------------------|-------------------------------------------------------|-----------------------------------------------------------------------------------------------------------------------|-----------------------------------------------------------------------------------------------------------|
| 9   | 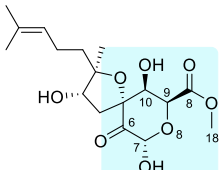 <p>aspersiropene A<sup>13</sup><br/>fungus (2017)</p>     | HRESIMS<br>1D and 2D NMR<br>computer-aided            |                                     | HRESIMS;<br>re-evaluation<br>NMR;<br>UV; IR;<br>Snatzke's<br>method;<br>TDDFT-ECD<br>(2021) <sup>14</sup> |
| 10  |  <p>trichotoxin<sup>15</sup><br/>cyanobacterium (2011)</p> | COSY;<br>HMBC                                         |  <p>trichotoxin = trichotoxin A</p> | NMR analysis;<br>biosynthesis<br>(2016) <sup>16</sup>                                                     |
| 11  |  <p>acremine P<sup>17</sup><br/>fungus (2013)</p>          | HMBC;<br>chemical<br>transformation                   |                                     | re-evaluation<br>NMR;<br>computer-aided<br>(2017) <sup>18</sup>                                           |
| 12  |  <p>paesslerin A<sup>19</sup><br/>coral (2001)</p>       | NMR                                                   |                                   | re-evaluation<br>NMR;<br>total synthesis<br>(2019) <sup>20</sup>                                          |
| 13  |  <p>protoaculeine B<sup>21</sup><br/>sponge (2014)</p>   | MALDI-TOFMS;<br>2D NMR;<br>chemical<br>transformation |                                   | total synthesis<br>(2020, 2021) <sup>22, 23</sup>                                                         |

Only the structure elucidation methods used for the erroneous structure element are mentioned in this table.

**Table S2.** Wrong constitution of a heterocyclic ring scaffold of MNPs (2010–2021).

| no. | Proposed structure                                                                                                                                                                                                                                                                                              | Methods used in initial assignment                                            | Revised structure                                                                                                     | Basis for revision                                                                                                                    |
|-----|-----------------------------------------------------------------------------------------------------------------------------------------------------------------------------------------------------------------------------------------------------------------------------------------------------------------|-------------------------------------------------------------------------------|-----------------------------------------------------------------------------------------------------------------------|---------------------------------------------------------------------------------------------------------------------------------------|
| 1   | 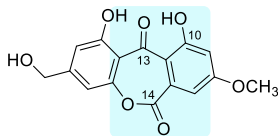 <p>wentiquinone C<sup>24</sup><br/>fungus (2014)</p>                                                                                                                                                                          | NMR comparison                                                                |                                     | NMR;<br>chemical transformation;<br>X-ray (2019) <sup>25</sup>                                                                        |
| 2   |  <p>fusariumin D<sup>26</sup><br/>strain (2019)</p>                                                                                                                                                                            | chemical shifts;<br>COSY;<br>HMBC                                             |  <p>fusariumin D = fusarester C</p> | NMR comparison;<br>computer-aided<br>(2019) <sup>27</sup>                                                                             |
| 3   |  <p>madurastatin C<sup>128</sup><br/>fungus (2012)</p>                                                                                                                                                                         | NMR                                                                           |                                     | partial synthesis;<br>NMR reanalysis<br>(2017) <sup>29</sup>                                                                          |
| 4   |  <p>citreindole<sup>30</sup><br/>strain (1991)</p>                                                                                                                                                                            | COSY;<br>HMBC;<br>acid hydrolysis;<br>chiral HPLC                             |                                    | chiral HPLC;<br>C <sub>3</sub> Marfey's analysis<br>(2016) <sup>31</sup>                                                              |
| 5   |  <p>acremolin<sup>32</sup><br/>fungus (2012)</p>                                                                                                                                                                             | COSY;<br>HMBC                                                                 |                                    | NMR reanalysis<br>(2012) <sup>33</sup> ;<br>total synthesis;<br><sup>1</sup> H- <sup>15</sup> N HMBC;<br>J-based (2013) <sup>34</sup> |
| 6   |  <p>pseudocerosine<sup>35</sup><br/>flatworm (2009)</p>                                                                                                                                                                      | <sup>1</sup> H- <sup>13</sup> C HMBC;<br><sup>1</sup> H- <sup>15</sup> N HMBC |                                   | synthesis<br>(2020) <sup>36</sup>                                                                                                     |
| 7–9 |  <p>dysiherbol A<sup>37</sup>: R<sub>1</sub> = R<sub>2</sub> = H<br/>dysiherbol B<sup>37</sup>: R<sub>1</sub> = OH, R<sub>2</sub> = H<br/>dysiherbol C<sup>37</sup>: R<sub>1</sub> = R<sub>2</sub> = O<br/>sponge (2016)</p> | HRESIMS;<br>HMBC;<br>NMR comparison                                           |                                   | total synthesis;<br>X-ray (2021) <sup>38, 39</sup>                                                                                    |

Table S2 (continued)

| no.   | Proposed structure                                                                                                                                                                                                                                                                                  | Methods used in initial assignment | Revised structure                                                                                                                                                                                                                                                                            | Basis for revision                                                                      |
|-------|-----------------------------------------------------------------------------------------------------------------------------------------------------------------------------------------------------------------------------------------------------------------------------------------------------|------------------------------------|----------------------------------------------------------------------------------------------------------------------------------------------------------------------------------------------------------------------------------------------------------------------------------------------|-----------------------------------------------------------------------------------------|
| 10    | 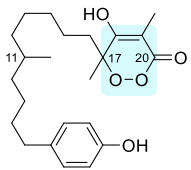 <p>plakinidone<sup>40</sup><br/>sponge (1991)</p>                                                                                                                                                                 | HRMS;<br>NMR                       |                                                                                                                                                                                                            | synthesis<br>(2015, 2016) <sup>41, 42</sup> ;<br>computer-aided<br>(2016) <sup>42</sup> |
| 11&12 |  <p>(24S)-24-ethylcholest-8-ene-3β,5α,6β,7α-tetraol<sup>43</sup>; <math>\Delta^{8,9}</math><br/>(24S)-24-ethylcholest-8(14)-ene-3β,5α,6β,7α-tetraol<sup>43</sup>; <math>\Delta^{8,14}</math><br/>sponge (1995)</p> | HRMS;<br>NMR;<br>NMR comparison    |  <p>= (24S)-5α,6α-epoxy-24-ethylcholest-8-ene-3β,7α-diol<sup>44</sup>; <math>\Delta^{8,9}</math><br/>= (24S)-5α,6α-epoxy-24-ethylcholest-8(14)-ene-3β,7α-diol<sup>44</sup>; <math>\Delta^{8,14}</math></p> | MS reanalysis;<br>NMR comparison<br>(2015) <sup>44</sup>                                |
| 13    |  <p>(22E)-24-methylcholesta-8(14),22-diene-3β,5α,6β,7α-tetraol<sup>45</sup><br/>fungus (2006)</p>                                                                                                                 | HRFABMS;<br>NMR                    |  <p>= 5α,6α-epoxy-(22E,24R)-24-methylcholesta-8(14),22-diene-3β,7α-diol</p>                                                                                                                               | NMR comparison<br>(2016) <sup>46</sup>                                                  |
| 14    |  <p>rhizophorin A<sup>47</sup><br/>mangrove (2001)</p>                                                                                                                                                           | CIMS;<br>NMR                       |  <p>rhizophorin A = excolide A</p>                                                                                                                                                                       | NMR;<br>CD;<br>X-ray;<br>chemical<br>derivatization<br>(2015) <sup>48</sup>             |
| 15&16 |  <p>aspergione E<sup>49</sup>: R = Me<br/>aspergione F<sup>49</sup>: R = H<br/>fungus (2003)</p>                                                                                                                 | NMR comparison;<br>HRESIMS         |  <p>aspergione E = pergillin and MeOH (1:1)<br/>aspergione F = pergillin</p>                                                                                                                             | synthesis (2015) <sup>50</sup>                                                          |
| 17&18 |  <p>marinamide<sup>51</sup>: R = H<br/>marinamide methyl ester<sup>51</sup>: R = CH<sub>3</sub><br/>fungi (2006)</p>                                                                                             | COSY;<br>HMBC;<br>NMR comparison   |                                                                                                                                                                                                          | chemical<br>transformation<br>(2013) <sup>52</sup>                                      |

Table S2 (continued)

| no.   | Proposed structure                                                                                                                                                                                        | Methods used in initial assignment | Revised structure                                                                                                                                                         | Basis for revision                                                                                   |
|-------|-----------------------------------------------------------------------------------------------------------------------------------------------------------------------------------------------------------|------------------------------------|---------------------------------------------------------------------------------------------------------------------------------------------------------------------------|------------------------------------------------------------------------------------------------------|
| 19    | 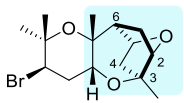<br>aldingenin A <sup>53</sup><br>alga (2003)                                                                            | HREIMS;<br>COSY;<br>HMBC           | <br>aldingenin A = 5-(S)-hydroxycaespitol                                               | computer-aided<br>(2015) <sup>54</sup>                                                               |
| 20    | <br>aldingenin B <sup>55</sup><br>alga (2006)                                                                            | HREIMS;<br>NMR comparison          | <br>aldingenin B = hemiacetal                                                           | total synthesis<br>(2012) <sup>56</sup> ;<br>computer-aided<br>(2015) <sup>54</sup>                  |
| 21&22 | <br>aldingenin C <sup>55</sup> : R = H<br>aldingenin D <sup>55</sup> : R = OAc<br>alga (2006)                            | HREIMS;<br>NMR comparison          | <br>aldingenin C = caespitol: R = H<br>aldingenin D<br>= 5-(S)-acetoxycespitol: R = OAc | synthesis<br>(2014) <sup>57</sup> ;<br>computer-aided<br>(2015) <sup>54</sup>                        |
| 23    | <br>phomopsis B <sup>58</sup><br>fungus (2008)                                                                          | HREIMS;<br>HMBC;<br>NMR comparison | <br>phomopsis B = dothiorelone A                                                       | total synthesis<br>(2011) <sup>59</sup>                                                              |
| 24    | <br>amphidinolide N <sup>60</sup><br>dinoflagellate (1994)                                                             | HRFABMS;<br>2D NMR;<br>J-based     |                                                                                       | ESIMS;<br>NMR solvents;<br>HMBC;<br>J-based;<br>NOESY (2013) <sup>61</sup>                           |
| 25    | <br>sarcophytol<br>sarcotrocheliol<br>sarcophytol <sup>62</sup> (sarcotrocheliol <sup>63</sup> )<br>coral (2014, 2015) | COSY;<br>HMBC                      | <br>sarcotrocheliol<br>sarcophytol                                                    | X-ray (2019) <sup>64</sup><br>NMR<br>comparison;<br>reanalysis X-ray<br>results (2021) <sup>65</sup> |
| 26    | <br>cereoanhydride <sup>66</sup><br>fungus (2012)                                                                      | HMBC                               |                                                                                       | total synthesis;<br>X-ray (2016) <sup>67</sup> ;<br>computer-aided<br>(2017) <sup>68</sup>           |

Table S2 (continued)

| no. | Proposed structure                                                                                                                                                                                           | Methods used in initial assignment                                            | Revised structure                                                                                                                     | Basis for revision                                                                     |
|-----|--------------------------------------------------------------------------------------------------------------------------------------------------------------------------------------------------------------|-------------------------------------------------------------------------------|---------------------------------------------------------------------------------------------------------------------------------------|----------------------------------------------------------------------------------------|
| 27  | 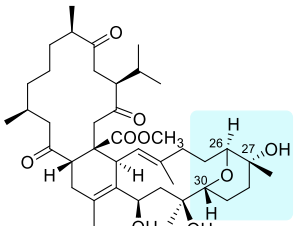 <p>methyl tortuoate D<sup>69</sup><br/>coral (2009)</p>                                                                    | COSY;<br>HMBC                                                                 |                                                     | re-evaluation<br>NMR<br>(2013) <sup>70</sup>                                           |
| 28  |  <p>plakortolide E<sup>71</sup><br/>sponge (1995)</p>                                                                       | HREIMS;<br>NMR;<br>chemical<br>transformation                                 |  <p>plakortolide E = <i>seco</i>-plakortolide E</p> | NMR<br>comparison<br>(2011) <sup>72</sup> ;<br>total synthesis<br>(2012) <sup>73</sup> |
| 29  |  <p>briarellin A<sup>74,75</sup><br/>coral (1995, 2003)</p>                                                                | HREIMS;<br>NMR comparison                                                     |                                                    | computer-aided<br>(2020) <sup>76</sup>                                                 |
| 30  |  <p>briarellin B<sup>74</sup>: R = H<br/>briarellin C<sup>74</sup>: R = COC<sub>3</sub>H<sub>7</sub><br/>coral (1995)</p> | NMR comparison                                                                |  <p>briarellin B</p>                              | computer-aided<br>(2020) <sup>76</sup>                                                 |
| 31  |  <p>briarellin D<sup>74</sup><br/>coral (1995)</p>                                                                        | NMR comparison                                                                |                                                   | computer-aided<br>(2020) <sup>76</sup>                                                 |
| 32  |  <p>briarellin J<sup>75,77</sup><br/>coral (2003)</p>                                                                     | 2D NMR;<br>NMR<br>comparison <sup>75</sup> ;<br>total synthesis <sup>77</sup> |                                                   | computer-aided<br>(2020) <sup>76</sup>                                                 |



Table S2 (continued)

| no. | Proposed structure                                                                                                                                                                                                                                                                                                                                                                                                                                                           | Methods used in initial assignment | Revised structure                                                                                      | Basis for revision                  |
|-----|------------------------------------------------------------------------------------------------------------------------------------------------------------------------------------------------------------------------------------------------------------------------------------------------------------------------------------------------------------------------------------------------------------------------------------------------------------------------------|------------------------------------|--------------------------------------------------------------------------------------------------------|-------------------------------------|
| 33  | 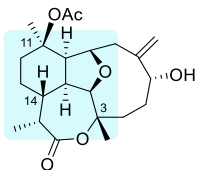 <p>briarellin K<sup>75</sup><br/>coral (2003)</p>                                                                                                                                                                                                                                                                                                                                          | NMR comparison                     |                      | computer-aided (2020) <sup>76</sup> |
| 34  |  <p>briarellin L<sup>75</sup><br/>coral (2003)</p>                                                                                                                                                                                                                                                                                                                                          | NMR comparison                     |                      | computer-aided (2020) <sup>76</sup> |
| 35  |  <p>briarellin M<sup>75</sup>: R<sub>1</sub> = Ac, R<sub>2</sub> = OH<br/>briarellin N<sup>75</sup>: R<sub>1</sub> = Ac, R<sub>2</sub> = OCH<sub>3</sub><br/>briarellin O<sup>75</sup>: R<sub>1</sub> = COC<sub>3</sub>H<sub>7</sub>, R<sub>2</sub> = OH<br/>briarellin P<sup>75</sup>: R<sub>1</sub> = COC<sub>3</sub>H<sub>7</sub>, R<sub>2</sub> = OCH<sub>3</sub><br/>coral (2003)</p> | NMR comparison                     |  <p>briarellin M</p> | computer-aided (2020) <sup>76</sup> |
| 36  |  <p>briarellin Q<sup>78</sup><br/>coral (2006)</p>                                                                                                                                                                                                                                                                                                                                        | NMR comparison                     |                    | computer-aided (2020) <sup>76</sup> |
| 37  |  <p>briarellin R<sup>78</sup><br/>coral (2006)</p>                                                                                                                                                                                                                                                                                                                                        | NMR comparison                     |                    | computer-aided (2020) <sup>76</sup> |
| 38  |  <p>briarellin H<sup>79</sup><br/>coral (1995)</p>                                                                                                                                                                                                                                                                                                                                        | NMR comparison                     |                    | computer-aided (2020) <sup>76</sup> |

**Table S2 (continued)**

| no. | Proposed structure                                                                                                                       | Methods used in initial assignment                     | Revised structure                                                                   | Basis for revision                             |
|-----|------------------------------------------------------------------------------------------------------------------------------------------|--------------------------------------------------------|-------------------------------------------------------------------------------------|------------------------------------------------|
| 39  | 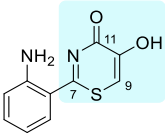 <p>thiasporine A<sup>80</sup><br/>bacterium (2015)</p> | NMR comparison;<br>HMBC;<br>chemical<br>transformation |   | total synthesis;<br>X-ray (2016) <sup>81</sup> |
| 40  |  <p>almazole D<sup>82</sup><br/>alga (1996)</p>         | NMR comparison                                         |   | synthesis<br>(2010) <sup>83</sup>              |
| 41  |  <p>topsentin C<sup>84</sup><br/>sponge (1990)</p>      | NMR comparison;<br>chemical shifts;<br>IR              |   | total synthesis<br>(2017) <sup>85</sup>        |
| 42  |  <p>(-)-ageloxime D<sup>86</sup><br/>sponge (2010)</p> | NMR comparison                                         |  | total synthesis<br>(2019) <sup>87</sup>        |

Only the structure elucidation methods used for the erroneous structure element are mentioned in this table.

**Table S3.** Functional group misidentification of MNPs (2010–2021).

| no. | Proposed structure                                                                                                                                         | Methods used in initial assignment                                          | Revised structure                                                                                                            | Basis for revision                                                                                                                                                                        |
|-----|------------------------------------------------------------------------------------------------------------------------------------------------------------|-----------------------------------------------------------------------------|------------------------------------------------------------------------------------------------------------------------------|-------------------------------------------------------------------------------------------------------------------------------------------------------------------------------------------|
| 1   | 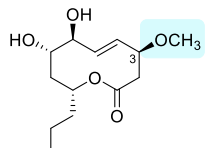 <p>phomolide H<sup>88</sup><br/>fungus (2010)</p>                        | HRMS;<br>NMR comparison                                                     |                                            | total synthesis;<br>X-ray (2017) <sup>89</sup>                                                                                                                                            |
| 2   |  <p>forazoline A<sup>90</sup><br/>strain (2014)</p>                       | MS isotopic analysis;<br>NMR;<br><sup>13</sup> C- <sup>13</sup> C gCOSY NMR |                                            | isotopic fine<br>structure analysis;<br>X-ray (2020) <sup>91</sup>                                                                                                                        |
| 3   |  <p>echinosulfone A<sup>92</sup><br/>sponge (1999)</p>                   | NMR comparison                                                              |                                           | NMR;<br>decomposition;<br>MS fragmentation;<br>SDP4+ analysis;<br>X-ray (2020) <sup>93</sup> ; MS;<br>NMR reanalysis<br>(2020) <sup>94</sup> ;<br>total synthesis<br>(2020) <sup>95</sup> |
| 4   |  <p>gomerone B<sup>96, 97</sup><br/>alga (2008)</p>                     | NMR comparison <sup>96</sup> ;<br>total synthesis <sup>97</sup>             |                                          | computer-aided<br>(2017) <sup>98</sup>                                                                                                                                                    |
| 5   |  <p>lembyne B<sup>99</sup><br/>alga (2001)</p>                          | HREIMS;<br>NMR                                                              |  <p>X = Cl, Y = Br or X = Br, Y = Cl</p> | computer-aided<br>(2017) <sup>98</sup>                                                                                                                                                    |
| 6   |  <p>10-bromo-7-hydroxy-11-iodolaurene<sup>100</sup><br/>alga (1979)</p> | MS;<br>NMR comparison                                                       |                                          | computer-aided<br>(2017) <sup>98</sup>                                                                                                                                                    |
| 7   |  <p>rigidol<sup>101</sup><br/>alga (1997)</p>                           | HRMS;<br>IR;<br>chemical shifts                                             |                                          | computer-aided<br>(2017) <sup>98</sup>                                                                                                                                                    |

**Table S3 (continued)**

| no. | Proposed structure                                                                                                                          | Methods used in initial assignment | Revised structure                                                                                                         | Basis for revision                       |
|-----|---------------------------------------------------------------------------------------------------------------------------------------------|------------------------------------|---------------------------------------------------------------------------------------------------------------------------|------------------------------------------|
| 8   | 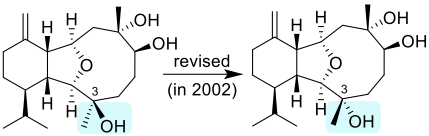 <p>sclerophytin F<sup>102, 103</sup><br/>coral (1989)</p> | EIMS;<br>NMR comparison            |  <p>sclerophytin F = sclerophytin E</p> | total synthesis<br>(2015) <sup>104</sup> |
| 9   |  <p>peyssonenyne B<sup>105</sup><br/>alga (2004)</p>       | NMR comparison;<br>2D NMR          |                                         | total synthesis<br>(2011) <sup>106</sup> |

Only the structure elucidation methods used for the erroneous structure element are mentioned in this table.

**Table S4.** Functional group mispositioning of MNPs (2010–2021).

| no. | Proposed structure                                                                                                                                       | Methods used in initial assignment                                                          | Revised structure                                                                                                                  | Basis for revision                                                                                       |
|-----|----------------------------------------------------------------------------------------------------------------------------------------------------------|---------------------------------------------------------------------------------------------|------------------------------------------------------------------------------------------------------------------------------------|----------------------------------------------------------------------------------------------------------|
| 1   | 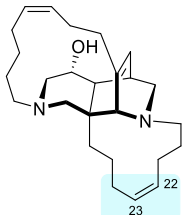 <p>xestocyclamine A<sup>107</sup>,<sup>108</sup><br/>sponge (1993)</p> | HMBC;<br><sup>1</sup> H- <sup>1</sup> H COSY                                                |  <p>xestocyclamine A = <i>ent</i>-ingenamine</p> | total synthesis<br>(2020) <sup>109</sup>                                                                 |
| 2   |  <p>uprolide G acetate<sup>110,111</sup><br/>coral (1995)</p>           | NMR comparison;<br>NOESY <sup>110</sup> ;<br>revised by partial<br>synthesis <sup>111</sup> |                                                  | total synthesis<br>(2015) <sup>112,113</sup> ;<br>X-ray (2015) <sup>112</sup>                            |
| 3   |  <p>uprolide F diacetate<sup>110,111</sup><br/>coral (1995)</p>        | NMR comparison;<br>NOESY <sup>110</sup> ;<br>revised by partial<br>synthesis <sup>111</sup> |                                                 | total synthesis<br>(2015) <sup>114</sup>                                                                 |
| 4   |  <p>pandangolide 3<sup>115</sup><br/>fungus (2001)</p>                | HMBC                                                                                        |                                                | NMR comparison;<br>HMBC;<br>NOESY;<br>ECD (2019) <sup>116</sup>                                          |
| 5   |  <p>mycalol<sup>117</sup><br/>sponge (2013)</p>                       | NMR;<br>chemical and<br>chiroptical methods;<br>Snatzke's and<br>Frelek's method            |                                                | total synthesis<br>(2015) <sup>118-120</sup>                                                             |
| 6   |  <p>burnettramic acid A<sup>121</sup><br/>fungus (2019)</p>           | <sup>1</sup> H- <sup>1</sup> H COSY;<br>HMBC                                                |                                                | NMR;<br>chemical<br>derivatization;<br>Mosher's<br>method;<br>Marfey's analysis<br>(2020) <sup>122</sup> |

**Table S4 (continued)**

| no.       | Proposed structure                                                                                                                                                                                                                                                                                                                                                      | Methods used in initial assignment                              | Revised structure                                                                    | Basis for revision                                                                                                                                                   |
|-----------|-------------------------------------------------------------------------------------------------------------------------------------------------------------------------------------------------------------------------------------------------------------------------------------------------------------------------------------------------------------------------|-----------------------------------------------------------------|--------------------------------------------------------------------------------------|----------------------------------------------------------------------------------------------------------------------------------------------------------------------|
| 7         | 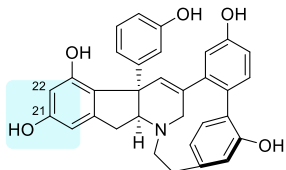 <p>haouamine B<sup>123</sup><br/>ascidian (2003)</p>                                                                                                                                                                                                                                  | NMR comparison;<br>HMBC;<br>biosynthetic analysis               |    | total synthesis<br>(2012, 2014) <sup>124, 125</sup>                                                                                                                  |
| 8–<br>11  |  <p>amathamide C<sup>126</sup>: <math>\Delta^{8,9}</math> 8E, R = CH<sub>3</sub><br/>amathamide D<sup>126</sup>: R = H<br/>amathamide E<sup>126</sup>: <math>\Delta^{8,9}</math> 8E, R = H<br/>amathamide F<sup>126</sup>: <math>\Delta^{8,9}</math> 8Z, R = H<br/>bryozoan (1987)</p> | NMR comparison                                                  |    | chemical shifts<br>(2011) <sup>127</sup><br>total synthesis<br>(2012) <sup>128</sup><br>total synthesis<br>(2015) <sup>129</sup>                                     |
| 12–<br>15 |  <p>echinosulfonic acid A<sup>92</sup>: R = OEt<br/>echinosulfonic acid B<sup>92</sup>: R = OCH<sub>3</sub><br/>echinosulfonic acid C<sup>92</sup>: R = OH<br/>echinosulfonic acid D<sup>130</sup>: R = H<br/>sponge (1999, 2005)</p>                                                 | NMR comparison <sup>92</sup> ;<br>MS/MS analysis <sup>130</sup> |   | decomposition;<br>NMR comparison<br>(2020) <sup>93</sup> ;<br>MS;<br>NMR reanalysis<br>(2020) <sup>94</sup> ;<br>biogenetic<br>consideration<br>(2020) <sup>95</sup> |
| 16        |  <p>streptophenazine A<sup>131</sup><br/>strain (2008)</p>                                                                                                                                                                                                                           | COSY;<br>HMBC                                                   |  | total synthesis<br>(2011) <sup>132</sup>                                                                                                                             |
| 17        |  <p>tristichone C<sup>133</sup><br/>alga (2016)</p>                                                                                                                                                                                                                                  | COSY;<br>HMBC                                                   |  | computer-aided<br>(2017) <sup>98</sup>                                                                                                                               |
| 18        |  <p>nocarbenoxazole G<sup>134</sup><br/>strain (2015)</p>                                                                                                                                                                                                                            | NMR comparison;<br>HMBC                                         |  | total synthesis<br>(2019) <sup>135</sup>                                                                                                                             |

**Table S4** (continued)

| no. | Proposed structure                                                                                                               | Methods used in initial assignment | Revised structure                                                                                               | Basis for revision                                            |
|-----|----------------------------------------------------------------------------------------------------------------------------------|------------------------------------|-----------------------------------------------------------------------------------------------------------------|---------------------------------------------------------------|
| 19  | 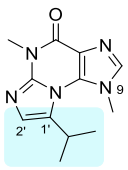<br>acremolin C <sup>136</sup><br>fungus (2018) | NMR comparison;<br>NOESY;<br>HMBC  | <br>acremolin C = acremolin B | NMR<br>comparison;<br>computer-aided<br>(2019) <sup>137</sup> |

Only the structure elucidation methods used for the erroneous structure element are mentioned in this table.

**Table S5.** Structural revisions of absolute configuration of MNPs (2010–2021).

| no. | Proposed structure                                                                                                                                                                                                                                                                                                                                                                                                                                                          | Methods used in initial assignment                                                                   | Revised structure                                                                    | Basis for revision                                                                     |
|-----|-----------------------------------------------------------------------------------------------------------------------------------------------------------------------------------------------------------------------------------------------------------------------------------------------------------------------------------------------------------------------------------------------------------------------------------------------------------------------------|------------------------------------------------------------------------------------------------------|--------------------------------------------------------------------------------------|----------------------------------------------------------------------------------------|
| 1&2 | 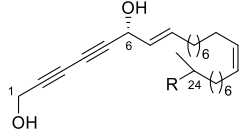 <p>strongylodiol H<sup>138</sup>: R = H<br/>strongylodiol I<sup>138</sup>: R = CH<sub>3</sub><br/>sponge (2005)</p>                                                                                                                                                                                                                                                                       | Mosher's method                                                                                      |    | total synthesis;<br>Mosher's method<br>(2018) <sup>139</sup>                           |
| 3   |  <p>xyloccensin Q<sup>140</sup><br/>mangrove (2005)</p>                                                                                                                                                                                                                                                                                                                                    | Mosher's method;<br>ECD analysis                                                                     |    | X-ray;<br>TDDFT-ECD<br>(2014) <sup>141</sup>                                           |
| 4–8 |  <p>xyloccensin O<sup>140</sup>: R<sub>1</sub> = OAc, R<sub>2</sub> = H<br/>xyloccensin P<sup>140</sup>: R<sub>1</sub> = R<sub>2</sub> = OAc<br/>xyloccensin R<sup>140</sup>: R<sub>1</sub> = R<sub>2</sub> = OH<br/>xyloccensin S<sup>140</sup>: R<sub>1</sub> = OH, R<sub>2</sub> = OAc<br/>xyloccensin V<sup>140</sup>: R<sub>1</sub> = H, R<sub>2</sub> = OAc<br/>mangrove (2005)</p> | Mosher's method;<br>ECD analysis                                                                     |   | ECD analysis<br>(2014) <sup>141</sup>                                                  |
| 9   |  <p>distaminolyne A<sup>142</sup><br/>ascidian (2016)</p>                                                                                                                                                                                                                                                                                                                                | dibenzoate exciton<br>coupled CD                                                                     |  | total synthesis;<br>OR;<br>chiral derivatizing<br>agents (2017) <sup>143</sup>         |
| 10  |  <p>ehrenbergol D<sup>144</sup><br/>coral (2015)</p>                                                                                                                                                                                                                                                                                                                                     | empirical<br>helicity rule                                                                           |  | TDDFT-ECD<br>(2019) <sup>145</sup>                                                     |
| 11  |  <p>peribysin A<sup>146-148</sup><br/>sea hare (2004, 2005)</p>                                                                                                                                                                                                                                                                                                                          | chemical<br>conversion <sup>147</sup> ;<br>total synthesis;<br>X-ray (Mo K $\alpha$ ) <sup>148</sup> |  | enantiospecific<br>total synthesis;<br>X-ray (Cu K $\alpha$ )<br>(2020) <sup>149</sup> |
| 12  |  <p>peribysin B<sup>146, 148</sup><br/>sea hare (2004)</p>                                                                                                                                                                                                                                                                                                                               | total synthesis;<br>X-ray (Mo K $\alpha$ ) <sup>148</sup>                                            |  | enantiospecific<br>total synthesis<br>(2020) <sup>149</sup>                            |



**Table S5 (continued)**

| no.       | Proposed structure                                                                                                                                                                                                    | Methods used in initial assignment | Revised structure                                                                                                                                                      | Basis for revision                                    |
|-----------|-----------------------------------------------------------------------------------------------------------------------------------------------------------------------------------------------------------------------|------------------------------------|------------------------------------------------------------------------------------------------------------------------------------------------------------------------|-------------------------------------------------------|
| 13        | 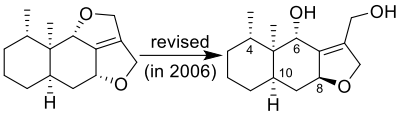 <p>peribysin C<sup>146, 150</sup><br/>sea hare (2004)</p>                                                                           | computer-aided <sup>150</sup>      |                                                                                      | enantiospecific total synthesis (2020) <sup>149</sup> |
| 14&<br>15 |  <p>peribysin F<sup>147</sup>: 7<math>\alpha</math>-OH<br/>peribysin G<sup>147</sup>: 7<math>\beta</math>-OH<br/>sea hare (2005)</p> | chemical transformation;<br>ECD    |  <p>peribysin F: 7<math>\beta</math>-OH<br/>peribysin G: 7<math>\alpha</math>-OH</p> | enantiospecific total synthesis (2020) <sup>149</sup> |
| 16        |  <p>haliclonadamine<sup>151, 152</sup><br/>sponge (1988)</p>                                                                         | total synthesis <sup>152</sup>     |                                                                                      | X-ray;<br>calculated ECD (2020) <sup>153</sup>        |
| 17        |  <p>plakortolide I<sup>154</sup><br/>sponge (2003)</p>                                                                              | OR comparison                      |                                                                                     | total synthesis;<br>OR (2012) <sup>73</sup>           |

Only the structure elucidation methods used for the erroneous structure element are mentioned in this table.

**Table S6.** Single stereocenter misidentification of MNPs (2010–2021).

| no. | Proposed structure                                                                                                                                                                                    | Methods used in initial assignment                 | Revised structure                                                                    | Basis for revision                                  |
|-----|-------------------------------------------------------------------------------------------------------------------------------------------------------------------------------------------------------|----------------------------------------------------|--------------------------------------------------------------------------------------|-----------------------------------------------------|
| 1   | 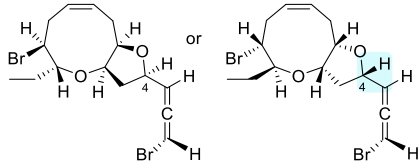 <p>(+)-itomanallene A<sup>155</sup><br/>alga (2002)</p>                                                             | NOESY;<br>Lowe's rule                              |    | total synthesis<br>(2010) <sup>156</sup>            |
| 2   |  <p>palmyrolide A<sup>157</sup><br/>cyanobacteria (2010)</p>                                                         | NOESY;<br><i>J</i> -based;<br>selective hydrolysis |    | total synthesis<br>(2012) <sup>158-160</sup>        |
| 3   |  <p>(+)-dictyosphaeric acid A<sup>161</sup><br/>fungus (2004)</p>                                                   | NOESY;<br>ROESY;<br><i>J</i> -based                |   | total synthesis<br>(2010) <sup>162</sup>            |
| 4&5 |  <p>laurefurenyne E<sup>163</sup>: 3<i>Z</i><br/>laurefurenyne F<sup>163</sup>: 3<i>E</i><br/>alga (2010)</p>      | NOESY;<br>NMR comparison                           |  | total synthesis<br>(2020) <sup>164</sup>            |
| 6   |  <p>lyngbouillose<sup>165</sup><br/>cyanobacterium (2002)</p>                                                      | ROESY;<br><i>J</i> -based                          |  | total synthesis<br>(2012) <sup>166</sup>            |
| 7&8 |  <p>isosarcophytonolide D<sup>167</sup>: Δ<sup>7,8</sup><br/>sarcophytonolide J<sup>168</sup><br/>coral (2007)</p> | NOESY;<br>NMR comparison                           |  | total synthesis<br>(2016, 2018) <sup>169, 170</sup> |

**Table S6 (continued)**

| no.       | Proposed structure                                                                                                                                                                                                                                                              | Methods used in initial assignment                                                                                                 | Revised structure                                                                    | Basis for revision                                            |
|-----------|---------------------------------------------------------------------------------------------------------------------------------------------------------------------------------------------------------------------------------------------------------------------------------|------------------------------------------------------------------------------------------------------------------------------------|--------------------------------------------------------------------------------------|---------------------------------------------------------------|
| 9         | 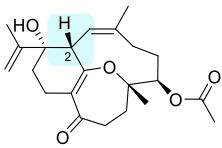 <p>sarsolenone<sup>171</sup><br/>coral (1995)</p>                                                                                                                                             | NOESY                                                                                                                              |    | NOESY reanalysis;<br>TDDFT ECD<br>(2014) <sup>172</sup>       |
| 10        |  <p>sartrolide C<sup>173</sup><br/>coral (2013)</p>                                                                                                                                            | NOESY                                                                                                                              |    | NMR comparison;<br>computer-aided<br>(2018) <sup>174</sup>    |
| 11&<br>12 |  <p>bislatumlide A<sup>167</sup>: 11E<br/>bislatumlide B<sup>167</sup>: 11Z<br/>coral (2007)</p>                                                                                               | NOESY;<br>NMR comparison                                                                                                           |    | NMR comparison;<br>TDDFT-ECD<br>(2013) <sup>175</sup>         |
| 13&<br>14 |  <p>xiamenmycin A<sup>176</sup>: R = <br/>xiamenmycin C: R<sup>177</sup> = H<br/>strains (2012, 2013)</p> | NOESY;<br>Mosher's method;<br>Marfey's reagent;<br>QM calculations <sup>176</sup><br>biosynthetic;<br>CD comparison <sup>177</sup> |  | total synthesis<br>(2016) <sup>178, 179</sup>                 |
| 15        |  <p>laurokamin A<sup>180</sup><br/>alga (2012)</p>                                                                                                                                           | NOESY                                                                                                                              |   | chemical shifts;<br>NOESY reanalysis<br>(2018) <sup>181</sup> |
| 16        |  <p>12E-lembyne A<sup>182</sup><br/>alga (2001)</p>                                                                                                                                          | NMR comparison                                                                                                                     |   | computer-aided<br>(2017) <sup>98</sup>                        |
| 17&<br>18 |  <p>tristichol A<sup>133</sup>: R = CHBr<sub>2</sub><br/>tristichol B<sup>133</sup>: R = CH<sub>2</sub>OH<br/>alga (2016)</p>                                                                | NOESY;<br>NMR comparison                                                                                                           |  | computer-aided<br>(2017) <sup>98</sup>                        |

Table S6 (continued)

| no.       | Proposed structure                                                                                                                                                                                                                               | Methods used in initial assignment | Revised structure                                                                                                                                                                        | Basis for revision                                           |
|-----------|--------------------------------------------------------------------------------------------------------------------------------------------------------------------------------------------------------------------------------------------------|------------------------------------|------------------------------------------------------------------------------------------------------------------------------------------------------------------------------------------|--------------------------------------------------------------|
| 19        | 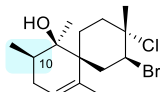<br>compositacin A <sup>181</sup><br>alga (2017)                                                                                                                | ROESY;<br>NMR comparison           |                                                                                                        | computer-aided<br>(2017) <sup>98</sup>                       |
| 20        | <br>kimura-cmpd 14 <sup>183</sup><br>alga (1999)                                                                                                                | NMR;<br>chemical<br>transformation |                                                                                                        | computer-aided<br>(2017) <sup>98</sup>                       |
| 21        | <br>compositacin L <sup>181</sup><br>alga (2017)                                                                                                                | ROESY;<br>NMR comparison           |                                                                                                        | computer-aided<br>(2017) <sup>98</sup>                       |
| 22        | <br>1(R)-Br-ent-maaliol <sup>184</sup><br>alga (1989)                                                                                                          | NOESY                              |                                                                                                        | computer-aided<br>(2017) <sup>98</sup>                       |
| 23&<br>24 | <br>tagalene I <sup>185</sup> : 4 $\alpha$ -CH <sub>2</sub> , 4S<br>4-epitagalene I <sup>186</sup> : 4 $\beta$ -CH <sub>2</sub> , 4R<br>mangrove (2016, 2017) | NOESY                              | <br>tagalene I: 4 $\beta$ -CH <sub>2</sub> , 4R<br>4-epitagalene I: 4 $\alpha$ -CH <sub>2</sub> , 4S | X-ray;<br>NOESY reanalysis<br>(2018) <sup>187</sup>          |
| 25&<br>26 | <br>tagalsin A <sup>188</sup> : 4 $\alpha$ -CH <sub>2</sub> , 4S<br>tagalsin B <sup>188</sup> : 4 $\beta$ -CH <sub>2</sub> , 4R<br>mangrove (2005)            | NOESY                              | <br>tagalsin A: 4 $\beta$ -CH <sub>2</sub> , 4R<br>tagalsin B: 4 $\alpha$ -CH <sub>2</sub> , 4S      | NOESY reanalysis;<br>NMR comparison<br>(2018) <sup>187</sup> |
| 27        | <br>cycloelatanene A <sup>189</sup><br>alga (2011)                                                                                                            | 1D NOE                             |                                                                                                      | crystalline sponge<br>method<br>(2018) <sup>190</sup>        |

Table S6 (continued)

| no.       | Proposed structure                                                                                                                                                                                                                                                        | Methods used in initial assignment                                          | Revised structure                                                                    | Basis for revision                                                                     |
|-----------|---------------------------------------------------------------------------------------------------------------------------------------------------------------------------------------------------------------------------------------------------------------------------|-----------------------------------------------------------------------------|--------------------------------------------------------------------------------------|----------------------------------------------------------------------------------------|
| 28        | 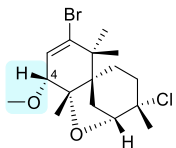 <p>cycloelatanene B<sup>189</sup><br/>alga (2011)</p>                                                                                                                                   | 1D NOE;<br>NMR comparison;                                                  |    | crystalline sponge method (2017) <sup>190</sup>                                        |
| 29        |  <p>penicitol A<sup>191</sup><br/>fungus (2015)</p>                                                                                                                                      | NOESY;<br>TDDFT-ECD                                                         |    | DP4+ analysis; calculated ECD spectra; analogue comparison (2021) <sup>192</sup>       |
| 30&<br>31 |  <p>(+)-xylogranatin F<sup>193</sup>: R = H;<br/>(+)-xylogranatin G<sup>193</sup>: R = Ac<br/>mangrove (2008)</p>                                                                       | NOESY;<br>chemical transformation;<br>Mosher's method                       |   | total synthesis; X-ray (2019) <sup>194</sup><br>DU8+ calculation (2020) <sup>195</sup> |
| 32        |  <p>azaspiracid-3<sup>196, 197</sup><br/>mussel (1999)</p>                                                                                                                             | ROESY;<br>NMR comparison <sup>196</sup> ;<br>total synthesis <sup>197</sup> |  | total synthesis (2018) <sup>198, 199</sup>                                             |
| 33&<br>34 |  <p>(-)-protubonine A<sup>200</sup>: R = H;<br/>(-)-protubonine B<sup>200</sup>: R = Ac<br/>fungus (2010)</p>                                                                          | NOESY                                                                       |  | total synthesis (2014) <sup>201</sup>                                                  |
| 35&<br>36 |  <p>cephalosporolide I<sup>202</sup>: R = (CH<sub>2</sub>)<sub>3</sub>COOH;<br/>cephalosporolide H<sup>202</sup>: R = (CH<sub>2</sub>)<sub>6</sub>CH<sub>3</sub><br/>fungus (2007)</p> | NOESY;<br>NMR comparison                                                    |  | total synthesis (2016) <sup>203</sup> ;<br>NMR method (2016) <sup>204</sup>            |

Table S6 (continued)

| no. | Proposed structure                                                                                                                                                                    | Methods used in initial assignment | Revised structure                                                                                                                                                | Basis for revision                         |
|-----|---------------------------------------------------------------------------------------------------------------------------------------------------------------------------------------|------------------------------------|------------------------------------------------------------------------------------------------------------------------------------------------------------------|--------------------------------------------|
| 37  | 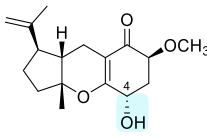<br>guignardone H <sup>205</sup><br>fungus (2012)                                                    | ROESY;<br>NMR comparison           | <br>Guignardone H is a racemic mixture or includes impurities <sup>206</sup> . | asymmetric synthesis (2019) <sup>206</sup> |
| 38  | <br>(-)-guignardone I <sup>205</sup><br>fungus (2012)                                                | ROESY;<br>NMR comparison           |                                                                                | asymmetric synthesis (2019) <sup>206</sup> |
| 39  | <br>(-)-isosarcophytin <sup>207</sup><br>coral (1999)                                                | NMR comparison                     | <br>(-)-isosarcophytin<br>= (-)-3-oxochatancin                                 | total synthesis (2019) <sup>208</sup>      |
| 40  | <br>halioxepine <sup>209</sup><br>(Only the relative configuration was proposed.)<br>sponge (2011) | NOESY                              |                                                                              | total synthesis (2021) <sup>210</sup>      |
| 41  | <br>julichrome Q <sub>3.5</sub> <sup>211</sup><br>fungus (1970)                                    | NMR comparison                     | <br>or                                                                       | X-ray (2020) <sup>212</sup>                |
| 42  | <br>boholamide A <sup>213</sup><br>bacteria (2020)                                                 | ROESY;<br>Marfey's method;<br>ECD  |                                                                              | total synthesis (2021) <sup>214</sup>      |

Table S6 (continued)

| no.       | Proposed structure                                                                                                                                                                                                                                | Methods used in initial assignment      | Revised structure                                                                    | Basis for revision                                                     |
|-----------|---------------------------------------------------------------------------------------------------------------------------------------------------------------------------------------------------------------------------------------------------|-----------------------------------------|--------------------------------------------------------------------------------------|------------------------------------------------------------------------|
| 43        | 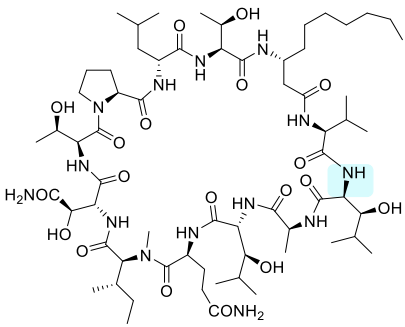 <p>laxaphycin B<sup>215, 216</sup><br/>alga (1992, 1997)</p>                                                                                                    | Marfey's method;<br>amino acid analysis |    | total synthesis;<br>HPLC retention time;<br>LCMS (2013) <sup>217</sup> |
| 44        |  <p>trichoderin A<sup>218</sup><br/>fungus (2010)</p>                                                                                                            | NOE;<br>HPLC analysis                   |    | total synthesis<br>(2016) <sup>219</sup>                               |
| 45        |  <p>peyssonol A<sup>220</sup><br/>alga (1994)</p>                                                                                                               | chemical shifts                         |   | total synthesis;<br>X-ray (2010) <sup>221</sup>                        |
| 46        |  <p>coibacin A<sup>222</sup><br/>cyanobacterium (2012)</p>                                                                                                     | CD analysis;<br>NOESY;<br>J-based       |  | total synthesis<br>(2014) <sup>223</sup>                               |
| 47        |  <p>coibacin B<sup>222</sup><br/>cyanobacterium (2012)</p>                                                                                                     | NMR comparison                          |  | total synthesis<br>(2014) <sup>223</sup>                               |
| 48&<br>49 |  <p>relgro<sup>224</sup>: R<sub>1</sub> = H, R<sub>2</sub> = OH<br/>10'-oxorelgro<sup>225</sup>: R<sub>1</sub> = R<sub>2</sub> = O<br/>fungus (2011, 2016)</p> | CD comparison;<br>Mosher's method       |  | total synthesis<br>(2019) <sup>226</sup>                               |
| 50        |  <p>amphirionin-5<sup>227</sup><br/>strain (2014)</p>                                                                                                          | J-based;<br>NOESY                       |  | stereodivergent<br>synthesis<br>(2016) <sup>228, 229</sup>             |

Table S6 (continued)

| no. | Proposed structure                                                                                                                                                   | Methods used in initial assignment                                     | Revised structure                                                                                                                        | Basis for revision                                                    |
|-----|----------------------------------------------------------------------------------------------------------------------------------------------------------------------|------------------------------------------------------------------------|------------------------------------------------------------------------------------------------------------------------------------------|-----------------------------------------------------------------------|
| 51  | 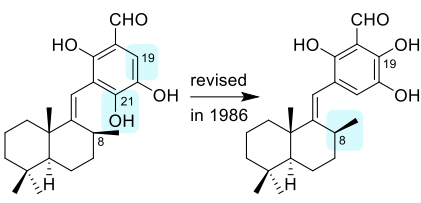 <p>siphonodictyal B<sup>230, 231</sup><br/>sponge (1981, 1986)</p>                 | <i>J</i> -based                                                        |                                                        | total synthesis;<br>NOESY (2015) <sup>232</sup>                       |
| 52  |  <p>7<math>\alpha</math>-hydroxytheonellasterol<sup>233</sup><br/>sponge (2000)</p> | <i>J</i> -based;<br>chemical shifts                                    |  <p>7<math>\beta</math>-hydroxytheonellasterol</p>     | chemical conversion;<br>NOESY;<br>X-ray (2020) <sup>234</sup>         |
| 53  |  <p>karlotoxin 2<br/>dinoflagellate (2010)<sup>235</sup></p>                       | <i>J</i> -based;<br>NOESY;<br>chemical degradation;<br>Mosher's method |                                                       | DP4 chemical-shift analysis<br>(2015) <sup>236</sup>                  |
| 54  |  <p>(+)-muironolide A<sup>237</sup><br/>sponge (2009)</p>                         | <i>J</i> -based;<br>chemical degradation;<br>chiral LC-MS;<br>NOESY    |  <p>(+)-muironolide A = <i>ent</i>-muironolide A</p> | total synthesis<br>(2015) <sup>238</sup>                              |
| 55  |  <p>(-)-bisezakyne A<sup>239</sup><br/>alga (1999)</p>                            | NOESY;<br>biogenetic consideration                                     |                                                      | total synthesis;<br>biogenetic consideration<br>(2016) <sup>240</sup> |

Only the structure elucidation methods used for the erroneous structure element are mentioned in this table.



**Table S7.** Multiple stereocenters misidentification of MNPs (2010–2021).

| no. | Proposed structure                                                                                                                         | Methods used in initial assignment | Revised structure                                                                                                      | Basis for revision                                                                              |
|-----|--------------------------------------------------------------------------------------------------------------------------------------------|------------------------------------|------------------------------------------------------------------------------------------------------------------------|-------------------------------------------------------------------------------------------------|
| 1   | 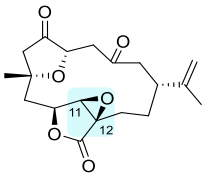<br>scabrolide D <sup>241</sup><br>coral (2002)           | NOESY                              | <br>scabrolide D = norcembrenolide C | total synthesis;<br>X-ray (2011) <sup>242</sup>                                                 |
| 2   | <br>lobocrasol <sup>243</sup><br>coral (2009)             | NOESY;<br>Mosher's method          |                                      | NMR<br>comparison;<br>X-ray (2021) <sup>244</sup>                                               |
| 3   | <br>glaucumolide A <sup>245</sup><br>coral (2015)        | NOESY;<br>NMR comparison           |                                     | NOESY;<br>J-based;<br>X-ray;<br>TDDFT-ECD<br>(2019) <sup>246</sup>                              |
| 4   | <br>glaucumolide B <sup>245</sup><br>coral (2015)       | NOESY;<br>NMR comparison           |                                    | NOESY;<br>NMR<br>comparison;<br>TDDFT-ECD<br>(2019) <sup>246</sup>                              |
| 5   | <br>pesralotioprolide F <sup>247</sup><br>fungus (2016) | NMR comparison;<br>NOESY           |                                    | total synthesis<br>(2018) <sup>248</sup>                                                        |
| 6   | <br>mandelalide A <sup>249</sup><br>ascidian (2012)     | ROESY;<br>J-based                  |                                    | total synthesis<br>(2014, 2015) <sup>250-252</sup> ;<br>computer-aided<br>(2016) <sup>253</sup> |

Table S7 (continued)

| no.   | Proposed structure                                                                                                                                                                                                                     | Methods used in initial assignment | Revised structure                                                                    | Basis for revision                                        |
|-------|----------------------------------------------------------------------------------------------------------------------------------------------------------------------------------------------------------------------------------------|------------------------------------|--------------------------------------------------------------------------------------|-----------------------------------------------------------|
| 7     | 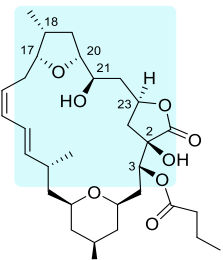<br>mandelalide B <sup>249</sup><br>ascidian (2012)                                                                                                   | ROESY;<br>J-based                  |    | total synthesis<br>(2015) <sup>252</sup>                  |
| 8 & 9 | <br>mandelalide C <sup>249</sup> : R = OH<br>mandelalide D <sup>249</sup> : R = COCH <sub>2</sub> CH <sub>2</sub> CH <sub>3</sub><br>ascidian (2012) | ROESY;<br>NMR comparison           |   | total synthesis<br>(2015) <sup>252</sup>                  |
| 10    | <br>clavosolide B <sup>254</sup><br>sponge (2002)                                                                                                   | ROESY;<br>NMR comparison           |  | enantioselective total<br>synthesis (2010) <sup>255</sup> |
| 11    | <br>(-)-lyngbyaloside B <sup>256</sup><br>cyanobacterium (2002)                                                                                     | ROESY                              |  | total synthesis<br>(2015, 2016) <sup>257, 258</sup>       |

Table S7 (continued)

| no.       | Proposed structure                                                                                                                                                                                                            | Methods used in initial assignment            | Revised structure                                                                    | Basis for revision                                                                                                                        |
|-----------|-------------------------------------------------------------------------------------------------------------------------------------------------------------------------------------------------------------------------------|-----------------------------------------------|--------------------------------------------------------------------------------------|-------------------------------------------------------------------------------------------------------------------------------------------|
| 12        | 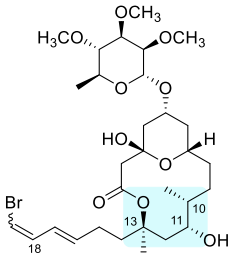 <p>18<i>E/Z</i>-lyngbyalide C<sup>259</sup><br/>cyanobacterium (2010)</p>                                                                   | <i>J</i> -based;<br>NOESY                     |    | total synthesis<br>(2015) <sup>260</sup>                                                                                                  |
| 13        |  <p>iriomoteolide-2a<sup>261</sup><br/>dinoflagellate (2015)</p>                                                                             | ROESY;<br><i>J</i> -based;<br>Mosher's method |    | total synthesis<br>(2018, 2019) <sup>262, 263</sup>                                                                                       |
| 14        |  <p>mangrolide D<sup>264</sup><br/>strain (2013)</p>                                                                                        | NMR                                           |   | total synthesis<br>(2019) <sup>265</sup>                                                                                                  |
| 15        |  <p>palmerolide C<sup>266</sup><br/>tunicate (2007)</p>                                                                                    | NOESY                                         |  | total synthesis<br>(2020) <sup>267, 268</sup>                                                                                             |
| 16&<br>17 |  <p>laurefurenyne C<sup>163</sup>: 3<i>Z</i><br/>laurefurenyne D<sup>163</sup>: 3<i>E</i><br/>alga (2010)</p>                              | NOESY;<br>NMR comparison                      |  | total synthesis<br>(2020) <sup>164</sup>                                                                                                  |
| 18&<br>19 |  <p>baulamycin A<sup>269</sup>: R = CH<sub>2</sub>CH<sub>3</sub><br/>baulamycin B<sup>269</sup>: R = CH<sub>3</sub><br/>microbe (2014)</p> | <i>J</i> -based;<br>(PS-DQF)-COSY;<br>HOMO2DJ |  | total synthesis <sup>270-273</sup> ;<br>DFT calculations <sup>270</sup> ;<br>chemical transformation;<br>ROESY (2017) <sup>270, 273</sup> |

Table S7 (continued)

| no. | Proposed structure                                                                                                                              | Methods used in initial assignment                                                    | Revised structure                                                                                                                                 | Basis for revision                                                                                         |
|-----|-------------------------------------------------------------------------------------------------------------------------------------------------|---------------------------------------------------------------------------------------|---------------------------------------------------------------------------------------------------------------------------------------------------|------------------------------------------------------------------------------------------------------------|
| 20  | 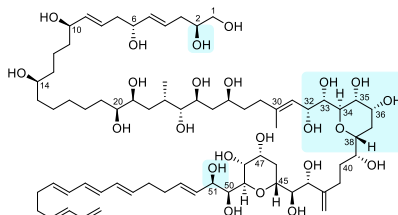 <p>amphidinol 3<sup>274</sup><br/>dinoflagellate (1999)</p>   | <p><i>J</i>-based;<br/>Mosher's method;<br/>degradation;<br/>GC-MS</p>                |  <p>OH revised (2008)<br/>revised (2018)<br/>revised (2013)</p> | <p>stereoselective synthesis (2013, 2018)<sup>275, 276</sup>;<br/>total synthesis (2020)<sup>277</sup></p> |
| 21  |  <p>thelepamide<sup>278</sup><br/>worm (2014)</p>              | <p>ROESY;<br/><i>J</i>-based;<br/>computer-aided</p>                                  |                                                                 | <p>total synthesis;<br/>computer-aided (2018)<sup>279</sup></p>                                            |
| 22  |  <p>coibamide A<sup>280</sup><br/>cyanobacterium (2008)</p>   | <p>ROESY;<br/>acid hydrolysis;<br/>HPLC-MS;<br/>GC-MS</p>                             |                                                                | <p>total synthesis (2014, 2015)<sup>281, 282</sup>;<br/>computer-aided (2016)<sup>253</sup></p>            |
| 23  |  <p>lagunamide A<sup>283</sup><br/>cyanobacterium (2010)</p> | <p>NOESY;<br/>ROESY;<br/><i>J</i>-based;<br/>Marfey's method;<br/>Mosher's method</p> |                                                               | <p>total synthesis (2012)<sup>284</sup></p>                                                                |
| 24  |  <p>similanamide<sup>285</sup><br/>fungus (2015)</p>         | <p>NOESY;<br/>acid hydrolysis;<br/>chiral HPLC analysis</p>                           |                                                               | <p>total synthesis (2015)<sup>286</sup></p>                                                                |

Table S7 (continued)

| no.       | Proposed structure                                                                                                                                                                                                                                                                                                                           | Methods used in initial assignment                    | Revised structure                                                                    | Basis for revision                                          |
|-----------|----------------------------------------------------------------------------------------------------------------------------------------------------------------------------------------------------------------------------------------------------------------------------------------------------------------------------------------------|-------------------------------------------------------|--------------------------------------------------------------------------------------|-------------------------------------------------------------|
| 25        | 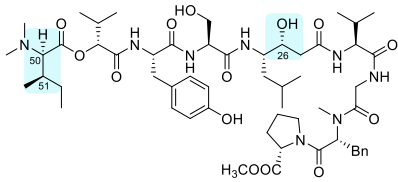 <p>symplotin A<sup>287</sup><br/>cyanobacterium (2012)</p>                                                                                                                                                                                                 | acid hydrolysis;<br>Marfey's method;<br>HPLC analysis |    | total synthesis<br>(2017) <sup>288</sup>                    |
| 26&<br>27 |  <p>solomonamide A<sup>289</sup>: R = OH<br/>solomonamide B<sup>289</sup>: R = H<br/>sponge (2011)</p>                                                                                                                                                      | ROESY;<br>computer-aided;<br>NMR comparison           |    | total synthesis<br>(2016, 2018) <sup>290, 291</sup>         |
| 28        |  <p>asperterrestide A<sup>292</sup><br/>fungus (2012)</p>                                                                                                                                                                                                  | NOESY;<br>J-based                                     |   | total synthesis<br>(2019) <sup>293</sup>                    |
| 29–<br>31 |  <p>plakotenin<sup>294</sup>: R<sub>1</sub> = Me, R<sub>2</sub> = H;<br/><i>homo</i>-plakotenin<sup>295</sup>: R<sub>1</sub> = R<sub>2</sub> = Me;<br/><i>nor</i>-plakotenin<sup>295</sup>: R<sub>1</sub> = R<sub>2</sub> = H<br/>sponge (1992, 1999)</p> | NOESY;<br>NMR comparison;<br>optical rotation         |   | total synthesis;<br>computer-aided<br>(2012) <sup>296</sup> |
| 32        |  <p>(-)-mucosin<sup>297</sup><br/>sponge (1997)</p>                                                                                                                                                                                                       | NOESY;<br>ROESY                                       |  | total synthesis<br>(2017, 2018) <sup>298, 299</sup>         |
| 33        |  <p>1β-bromo-4α,5α-epoxyselinane<sup>300</sup><br/>alga (2016)</p>                                                                                                                                                                                        | NOESY                                                 |   | computer-aided<br>(2017) <sup>98</sup>                      |

Table S7 (continued)

| no.       | Proposed structure                                                                                                                                                                        | Methods used in initial assignment | Revised structure                                                                    | Basis for revision                                                  |
|-----------|-------------------------------------------------------------------------------------------------------------------------------------------------------------------------------------------|------------------------------------|--------------------------------------------------------------------------------------|---------------------------------------------------------------------|
| 34        | 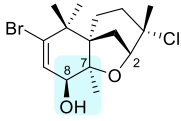 <p>(8<math>\beta</math>)-10-bromo-3-chloro-2,7-epoxychamigr-9-en-8-ol<sup>301</sup><br/>alga (2010)</p> | ROESY                              |    | computer-aided (2017) <sup>98</sup>                                 |
| 35        |  <p>coll-compd 4<sup>302</sup><br/>alga (1989)</p>                                                       | NMR comparison                     |    | computer-aided (2017) <sup>98</sup>                                 |
| 36        |  <p>axiriabiline A<sup>303</sup><br/>sponge (2017)</p>                                                   | ROESY                              |    | X-ray (2019) <sup>304</sup>                                         |
| 37        |  <p>(+)-hypoxylactone<sup>305</sup><br/>fungus (1999)</p>                                               | NOESY                              |   | synthesis (2020) <sup>306</sup>                                     |
| 38        |  <p>penisporolide A<sup>307</sup><br/>fungus (2007)</p>                                                | NOESY;<br>NMR comparison           |  | NMR method (2016) <sup>204</sup>                                    |
| 39        |  <p>penisporolide B<sup>307</sup><br/>fungus (2007)</p>                                                | NMR comparison                     |  | total synthesis (2016) <sup>203</sup>                               |
| 40&<br>41 |  <p>laurefurenyne A<sup>163</sup>: 3Z<br/>laurefurenyne B<sup>163</sup>: 3E<br/>alga (2010)</p>        | NOESY;<br>NMR comparison           |  | total synthesis (2013) <sup>308, 309</sup>                          |
| 42        |  <p>junceelloside C<sup>310</sup><br/>coral (2005)</p>                                                 | NOESY                              |  | J-based;<br>acid hydrolysis;<br>HPLC analysis (2013) <sup>311</sup> |

Table S7 (continued)

| no. | Proposed structure                                                                                                                                                                        | Methods used in initial assignment                            | Revised structure                                                                    | Basis for revision                                                                |
|-----|-------------------------------------------------------------------------------------------------------------------------------------------------------------------------------------------|---------------------------------------------------------------|--------------------------------------------------------------------------------------|-----------------------------------------------------------------------------------|
| 43  | 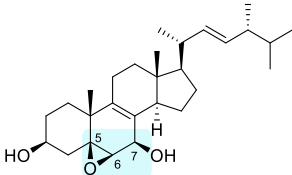 <p>5β,6β-epoxy-(22<i>E</i>,24<i>R</i>)-ergosta-8,22-diene-3β,7β-diol<sup>312</sup><br/>coral (2016)</p> | NOESY;<br>NMR comparison                                      |    | re-examine NMR (2017) <sup>313</sup>                                              |
| 44  |  <p>chaephilone C<sup>314</sup><br/>fungus (2018)</p>                                                    | NOESY;<br>TDDFT-ECD                                           |    | NMR comparison;<br>OR;<br>X-ray (2019) <sup>315</sup>                             |
| 45  |  <p>julichrome Q<sub>3,3</sub><sup>316, 317</sup><br/>strain (1970)</p>                                 | NMR                                                           |   | NMR comparison (2020) <sup>212</sup>                                              |
| 46  |  <p>didemnaketal B<sup>318</sup><br/>ascidian (1991)</p>                                               | NMR comparison                                                |  | total synthesis (2013, 2014) <sup>319, 320</sup> ,<br>X-ray (2014) <sup>320</sup> |
| 47  |  <p>(+)-azonazine<sup>321</sup><br/>fungus (2010)</p>                                                  | 1D NOE;<br>TDDFT-ECD                                          |  | total synthesis (2013, 2014) <sup>322, 323</sup>                                  |
| 48  |  <p>(-)-citrinadin A<sup>324, 325</sup><br/>fungus (2004)</p>                                          | ROESY <sup>324</sup><br>ECD;<br>VCD comparison <sup>325</sup> |  | total synthesis (2013, 2014) <sup>326, 327</sup>                                  |

Table S7 (continued)

| no. | Proposed structure                                                                                                                                | Methods used in initial assignment                                      | Revised structure                                                                    | Basis for revision                                                 |
|-----|---------------------------------------------------------------------------------------------------------------------------------------------------|-------------------------------------------------------------------------|--------------------------------------------------------------------------------------|--------------------------------------------------------------------|
| 49  | 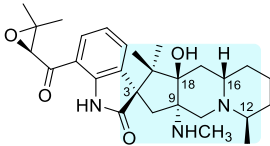 <p>(+)-citrinadin B<sup>325</sup><br/>fungus (2005)</p>         | ROESY;<br>ECD;<br>VCD comparison                                        |    | total synthesis<br>(2013, 2014) <sup>327, 328</sup>                |
| 50  |  <p>(+)-asperdimin<sup>329</sup><br/>fungus (2004)</p>           | NMR comparison;<br>acid hydrolysis                                      |    | total synthesis<br>(2014) <sup>201</sup>                           |
| 51  |  <p>(+)-cristatumin C<sup>330</sup><br/>fungus (2012)</p>       | NOESY;<br>acid hydrolysis;<br>chiral HPLC analysis                      |   | total synthesis<br>(2014) <sup>331</sup>                           |
| 52  |  <p>haenamindole<sup>332</sup><br/>fungus (2015)</p>           | ROESY;<br>Marfey's method                                               |  | ROESY;<br>C <sub>3</sub> Marfey analysis<br>(2016) <sup>31</sup>   |
| 53  |  <p>chrysamide B<sup>333</sup><br/>fungus (2016)</p>           | X-Ray                                                                   |  | total synthesis;<br>NMR comparison;<br>X-ray (2018) <sup>334</sup> |
| 54  |  <p>(-)-versiquinazoline H<sup>335</sup><br/>fungus (2016)</p> | NOESY;<br>ECD;<br>Marfey's method;<br>acid hydrolysis;<br>HPLC analysis |  | total synthesis<br>(2020) <sup>336</sup>                           |

Only the structure elucidation methods used for the erroneous structure element are mentioned in this table.



**Table S8.** Structural revisions of double bond geometry of MNPs (2010–2021).

| no. | Proposed structure                                                                                                                                                                                                                                               | Methods used in initial assignment                 | Revised structure                                                                    | Basis for revision                                                                                                                  |
|-----|------------------------------------------------------------------------------------------------------------------------------------------------------------------------------------------------------------------------------------------------------------------|----------------------------------------------------|--------------------------------------------------------------------------------------|-------------------------------------------------------------------------------------------------------------------------------------|
| 1   | 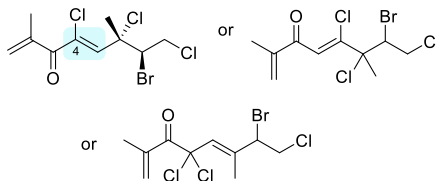 <p>or</p>  <p>plocamenone<sup>337-343</sup><br/>alga (1979, 1983, 1984, 1985, 1997, 2010)</p> | chemical shifts;<br>no complete 2D<br>NMR analysis |    | 2D NMR<br>(2012) <sup>344</sup>                                                                                                     |
| 2   |  <p>lucentamycin A<sup>345</sup><br/>strain (2007)</p>                                                                                                                          | ROESY                                              |    | total synthesis<br>(2009, 2012) <sup>346, 347</sup> ;<br>X-ray (2012) <sup>347</sup> ;<br>ROESY reanalysis<br>(2012) <sup>348</sup> |
| 3   |  <p>lucentamycin B<sup>345</sup><br/>strain (2007)</p>                                                                                                                         | NMR comparison                                     |   | NMR comparison<br>(2012) <sup>348</sup>                                                                                             |
| 4&5 |  <p>lucentamycin C<sup>345</sup><br/>lucentamycin D<sup>345</sup>: <math>\Delta^{23,24}</math><br/>strain (2007)</p>                                                          | NMR comparison                                     |  | NMR comparison<br>(2012) <sup>348</sup>                                                                                             |
| 6   |  <p>phacelocarpus 2-pyrone A<sup>349</sup><br/>alga (1982)</p>                                                                                                                | <i>J</i> -based                                    |  | total synthesis;<br>computer-aided<br>(2015) <sup>350</sup>                                                                         |

Only the structure elucidation methods used for the erroneous structure element are mentioned in this table.

## References

- 1 S.-H. Qi, G.-C. Su, Y.-F. Wang, Q.-Y. Liu and C.-H. Gao, *Chem. Pharm. Bull.*, 2009, **57**, 87-88, doi: 10.1248/cpb.57.87.
- 2 A. Berndt, M. Gruner, A. W. Schmidt and H.-J. Knöelker, *Synlett*, 2013, **24**, 2102-2106, doi: 10.1055/s-0033-1339655.
- 3 J. Dai, Y. Liu, Y.-D. Zhou and D. G. Nagle, *J. Nat. Prod.*, 2007, **70**, 1824-1826, doi: 10.1021/np070337f.
- 4 E. E. Podlesny and M. C. Kozlowski, *J. Nat. Prod.*, 2012, **75**, 1125-1129, doi: 10.1021/np300141t.
- 5 T. Liu, Z.-L. Li, Y. Wang, L. Tian, Y.-H. Pei and H.-M. Hua, *Nat. Prod. Res.*, 2011, **25**, 1596-1599, doi: 10.1080/14786419.2010.490916.
- 6 M. T. Green, G. R. Peczkowski, A. J. Al-Ani, S. L. Benjamin, N. S. Simpkins and A. M. Jones, *RSC Adv.*, 2017, **7**, 48754-48758, doi: 10.1039/c7ra10483a.
- 7 S. Um, T. J. Choi, H. Kim, B. Y. Kim, S.-H. Kim, S. K. Lee, K.-B. Oh, J. Shin and D.-C. Oh, *J. Org. Chem.*, 2013, **78**, 12321-12329, doi: 10.1021/jo401974g.
- 8 J. Hur, J. Jang, J. Sim, W. S. Son, H.-C. Ahn, T. S. Kim, Y.-H. Shin, C. Lim, S. Lee, H. An, S.-H. Kim, D.-C. Oh, E.-K. Jo, J. Jang, J. Lee and Y.-G. Suh, *Angew. Chem., Int. Ed.*, 2018, **57**, 3069-3073, doi: 10.1002/anie.201711286.
- 9 R. Irie, K. Takada, Y. Ise, S. Ohtsuka, S. Okada, K. R. Gustafson and S. Matsunaga, *Org. Lett.*, 2017, **19**, 5395-5397, doi: 10.1021/acs.orglett.7b02835.
- 10 K. Takada, B. W. Choi, M. A. Rashid, W. R. Gamble, J. H. Cardellina, II, Q. N. Van, J. R. Lloyd, J. B. McMahon and K. R. Gustafson, *J. Nat. Prod.*, 2007, **70**, 428-431, doi: 10.1021/np0604984.
- 11 D. Takemoto, Y. Takekawa, R. W. M. van Soest, N. Fusetani and S. Matsunaga, *Biosci., Biotechnol., Biochem.*, 2007, **71**, 2697-2700, doi: 10.1271/bbb.70293.
- 12 C. Chevallier, O. Laprèvote, J. Bignon, C. Debitus, D. Guénard and T. Sévenet, *Nat. Prod. Res.*, 2004, **18**, 479-484, doi: 10.1080/14786410310001626811.
- 13 Y. He, M. Zheng, Q. Li, Z. Hu, H. Zhu, J. Liu, J. Wang, Y. Xue, H. Li and Y. Zhang, *Org. Chem. Front.*, 2017, **4**, 1137-1144, doi: 10.1039/c6qo00847j.
- 14 V. A. Cao, B.-K. Choi, H.-S. Lee, C.-S. Heo and H. J. Shin, *J. Nat. Prod.*, 2021, **84**, 1843-1847, doi: 10.1021/acs.jnatprod.1c00288.
- 15 T. B. Schock, K. Huncik, K. R. Beauchesne, T. A. Villareal and P. D. R. Moeller, *Environ. Sci. Technol.*, 2011, **45**, 7503-7509, doi: 10.1021/es201034r.
- 16 M. J. Bertin, P. V. Zimba, H. He and P. D. R. Moeller, *Tetrahedron Lett.*, 2016, **57**, 5864-5867, doi: 10.1016/j.tetlet.2016.11.062.
- 17 Suciati, J. A. Fraser, L. K. Lambert, G. K. Pierens, P. V. Bernhardt and M. J. Garson, *J. Nat. Prod.*, 2013, **76**, 1432-1440, doi: 10.1021/np4002114.
- 18 M. J. Garson, W. Hehre, G. K. Pierens and Suciati, *Molecules*, 2017, **22**, 521, doi: 10.3390/molecules22040521.
- 19 M. F. Rodriguez Brasco, A. M. Seldes and J. A. Palermo, *Org. Lett.*, 2001, **3**, 1415-1417, doi: 10.1021/ol006684x.
- 20 Y. Mogi, K. Inanaga, H. Tokuyama, M. Ihara, Y. Yamaoka, K.-i. Yamada and K. Takasu, *Org. Lett.*, 2019, **21**, 3954-3958, doi: 10.1021/acs.orglett.9b01089.
- 21 S. Matsunaga, R. Kishi, K. Otsuka, M. J. Fujita, M. Oikawa and R. Sakai, *Org. Lett.*, 2014, **16**, 3090-3093, doi: 10.1021/ol5011888.
- 22 R. Irie, M. Miyahara, S. Nakamura, A. Honda, R. Sakai and M. Oikawa, *J. Nat. Prod.*, 2020, **83**, 2769-2775, doi: 10.1021/acs.jnatprod.0c00761.
- 23 R. Irie, K. Miyako, S. Matsunaga, R. Sakai and M. Oikawa, *J. Nat. Prod.*, 2021, **84**, 1203-1209, doi: 10.1021/acs.jnatprod.0c01280.
- 24 X. Li, X.-M. Li, G.-M. Xu, C.-S. Li and B.-G. Wang, *Phytochem. Lett.*, 2014, **7**, 120-123, doi: 10.1016/j.phytol.2013.11.008.
- 25 X. Li, X.-M. Li and B.-G. Wang, *Mar. Drugs*, 2019, **17**, 8, doi: 10.3390/md17010008.
- 26 J. Chen, X. Bai, Y. Hua, H. Zhang and H. Wang, *Fitoterapia*, 2019, **134**, 1-4, doi: 10.1016/j.fitote.2019.01.016.
- 27 J. Gong, C. Chen, S. Mo, J. Liu, W. Wang, Y. Zang, H. Li, C. Chai, H. Zhu, Z. Hu, J. Wang and Y. Zhang, *Org. Biomol. Chem.*, 2019, **17**, 5526-5532, doi: 10.1039/c9ob00534j.
- 28 E. Mazzei, M. Iorio, S. I. Maffioli, M. Sosio and S. Donadio, *J. Antibiot.*, 2012, **65**, 267-269, doi: 10.1038/ja.2012.10.
- 29 A. R. Tyler, H. Mosaei, S. Morton, P. G. Waddell, C. Wills, W. McFarlane, J. Gray, M. Goodfellow, J. Errington, N. Allenby, N. Zenkin and M. J. Hall, *J. Nat. Prod.*, 2017, **80**, 1558-1562, doi: 10.1021/acs.jnatprod.7b00082.
- 30 K. Matsunaga, Y. Shizuri, S. Yamamura, K. Kawai and H. Furukawa, *Tetrahedron Lett.*, 1991, **32**, 6883-6884, doi: 10.1016/0040-

4039(91)80433-7.

- 31 F. Song, H. He, R. Ma, X. Xiao, Q. Wei, Q. Wang, Z. Ji, H. Dai, L. Zhang and R. J. Capon, *Tetrahedron Lett.*, 2016, **57**, 3851-3852, doi: 10.1016/j.tetlet.2016.07.049.
- 32 E. Julianti, H. Oh, H.-S. Lee, D.-C. Oh, K.-B. Oh and J. Shin, *Tetrahedron Lett.*, 2012, **53**, 2885-2886, doi: 10.1016/j.tetlet.2012.03.133.
- 33 K. Banert, *Tetrahedron Lett.*, 2012, **53**, 6443-6445, doi: 10.1016/j.tetlet.2012.09.061.
- 34 L. A. Januar and T. F. Molinski, *Org. Lett.*, 2013, **15**, 2370-2373, doi: 10.1021/ol400752s.
- 35 P. J. Schupp, C. Kohlert-Schupp, W. Y. Yoshida and T. K. Hemscheidt, *Org. Lett.*, 2009, **11**, 1111-1114, doi: 10.1021/ol8027785.
- 36 S. H. Kim, T. Söhnle and J. Sperry, *Org. Lett.*, 2020, **22**, 3495-3498, doi: 10.1021/acs.orglett.0c00953.
- 37 W.-H. Jiao, G.-H. Shi, T.-T. Xu, G.-D. Chen, B.-B. Gu, Z. Wang, S. Peng, S.-P. Wang, J. Li, B.-N. Han, W. Zhang and H.-W. Lin, *J. Nat. Prod.*, 2016, **79**, 406-411, doi: 10.1021/acs.jnatprod.5b01079.
- 38 J. Baars, I. Grimm, D. Blunk, J.-M. Neudorfl and H.-G. Schmalz, *Angew. Chem., Int. Ed.*, 2021, **60**, 14915-14920, doi: 10.1002/anie.202105733.
- 39 C. Chong, Q. Zhang, J. Ke, H. Zhang, X. Yang, B. Wang, W. Ding and Z. Lu, *Angew. Chem., Int. Ed.*, 2021, **60**, 13807-13813, doi: 10.1002/anie.202100541.
- 40 D. M. Kushlan and D. J. Faulkner, *J. Nat. Prod.*, 1991, **54**, 1451-1454, doi: 10.1021/np50077a043.
- 41 Z.-J. Xu, D.-X. Tan and Y. Wu, *Org. Lett.*, 2015, **17**, 5092-5095, doi: 10.1021/acs.orglett.5b02599.
- 42 C. Jiménez-Romero, J. E. Rode and A. D. Rodríguez, *Tetrahedron Asymmetry*, 2016, **27**, 410-419, doi: 10.1016/j.tetasy.2016.03.011.
- 43 V. Costantino, E. Fattorusso, A. Mangoni and M. Pansini, *Steroids*, 1995, **60**, 768-772, doi: 10.1016/0039-128x(95)00117-9.
- 44 Y. Yaoita, M. Kikuchi and K. Machida, *Nat. Prod. Commun.*, 2015, **10**, 881-883, doi: 10.1177/1934578x1501000622.
- 45 Y. Sun, L. Tian, J. Huang, W. Li and Y.-H. Pei, *Nat. Prod. Res.*, 2006, **20**, 381-384, doi: 10.1080/14786410600661229.
- 46 Y. Yaoita and K. Machida, *Nat. Prod. Commun.*, 2016, **11**, 947-948, doi: 10.1177/1934578x1601100719.
- 47 A. S. R. Anjaneyulu and V. L. Rao, *Nat. Prod. Lett.*, 2001, **15**, 13-19, doi: 10.1080/10575630108041252.
- 48 S. C. V. Appa Rao Annam, M. Ankireddy, M. B. Sura, M. G. Ponnappalli, A. V. S. Sarma and J. Basha S, *Org. Lett.*, 2015, **17**, 2840-2843, doi: 10.1021/acs.orglett.5b01257.
- 49 W. Lin, G. Brauers, R. Ebel, V. Wray, A. Berg, Sudarsono and P. Proksch, *J. Nat. Prod.*, 2003, **66**, 57-61, doi: 10.1021/np020196b.
- 50 K. Kuramochi and K. Tsubaki, *J. Nat. Prod.*, 2015, **78**, 1056-1066, doi: 10.1021/np5010483.
- 51 F. Zhu and Y. Lin, *Chin. Sci. Bull.*, 2006, **51**, 1426-1430, doi: 10.1007/s11434-006-1426-4.
- 52 F. Zhu, G. Chen, J. Wu and J. Pan, *Nat. Prod. Res.*, 2013, **27**, 1960-1964, doi: 10.1080/14786419.2013.800980.
- 53 L. R. de Carvalho, M. T. Fujii, N. F. Roque, M. J. Kato and J. H. G. Lago, *Tetrahedron Lett.*, 2003, **44**, 2637-2640, doi: 10.1016/s0040-4039(03)00379-4.
- 54 O. A. Mukhina, H. Koshino, M. T. Crimmins and A. G. Kutateladze, *Tetrahedron Lett.*, 2015, **56**, 4900-4903, doi: 10.1016/j.tetlet.2015.06.078.
- 55 L. R. de Carvalho, M. T. Fujii, N. F. Roque and J. H. G. Lago, *Phytochemistry*, 2006, **67**, 1331-1335, doi: 10.1016/j.phytochem.2006.04.020.
- 56 M. T. Crimmins and C. O. Hughes, *Org. Lett.*, 2012, **14**, 2168-2171, doi: 10.1021/ol3007259.
- 57 S. Takahashi, M. Yasuda, T. Nakamura, K. Hatano, K. Matsuoka and H. Koshino, *J. Org. Chem.*, 2014, **79**, 9373-9380, doi: 10.1021/jo501228v.
- 58 Z. Huang, X. Cai, C. Shao, Z. She, X. Xia, Y. Chen, J. Yang, S. Zhou and Y. Lin, *Phytochemistry*, 2008, **69**, 1604-1608, doi: 10.1016/j.phytochem.2008.02.002.
- 59 Y. Izuchi, H. Koshino, Y. Hongo, N. Kanomata and S. Takahashi, *Org. Lett.*, 2011, **13**, 3360-3363, doi: 10.1021/ol2011117.
- 60 M. Ishibashi, N. Yamaguchi, T. Sasaki and J. Kobayashi, *J. Chem. Soc., Chem. Commun.*, 1994, 1455-1456, doi: 10.1039/c39940001455.
- 61 Y. Takahashi, T. Kubota, M. Imachi, M. R. Waelchli and J. Kobayashi, *J. Antibiot.*, 2013, **66**, 277-279, doi: 10.1038/ja.2012.117.
- 62 S. S. Al-Lihaibi, W. M. Alarif, A. Abdel-Lateff, S.-E. N. Ayyad, A. B. Abdel-Naim, F. F. El-Senduny and F. A. Badria, *Eur. J. Med. Chem.*, 2014, **81**, 314-322, doi: 10.1016/j.ejmech.2014.05.016.
- 63 K. O. Al-Footy, W. M. Alarif, F. Asiri, M. M. Aly and S.-E. N. Ayyad, *Med. Chem. Res.*, 2015, **24**, 505-512, doi: 10.1007/s00044-014-1147-1.

- 64 A. Hamed, M. Y. Issa, M. A. Ghani, M. Frese, B. Neumann, H. G. Stammer, N. Sewald and M. Shaaban, *Nat. Prod. Res.*, 2019, **33**, 3029-3032, doi: 10.1080/14786419.2018.1512997.
- 65 S.-M. Shen, W.-S. Li, X. Ding, H. Luo, H.-Y. Zhang and Y.-W. Guo, *Bioorg. Med. Chem.*, 2021, **38**, 116139, doi: 10.1016/j.bmc.2021.116139.
- 66 M. F. Elsebai, M. Nazir, S. Kehraus, E. Egereva, K. N. Ioset, L. Marcourt, D. Jeannerat, M. Güetschow, J.-L. Wolfender and G. M. König, *Eur. J. Org. Chem.*, 2012, **2012**, 6197-6203, doi: 10.1002/ejoc.201200700.
- 67 Z. Ren, Y. Hao and X. Hu, *Org. Lett.*, 2016, **18**, 4958-4961, doi: 10.1021/acs.orglett.6b02424.
- 68 C. M. Saunders and D. J. Tantillo, *Mar. Drugs*, 2017, **15**, 171, doi: 10.3390/md15060171.
- 69 W.-J. Lan, S.-L. Wang and H.-J. Li, *Nat. Prod. Commun.*, 2009, **4**, 1193-1196, doi: 10.1177/1934578x0900400907.
- 70 Y.-F. Li, L.-L. He, H.-L. Liu, L.-F. Liang, H.-B. Zhang and Y.-W. Guo, *J. Asian Nat. Prod. Res.*, 2013, **15**, 566-573, doi: 10.1080/10286020.2013.787988.
- 71 M. Varoglu, B. M. Peters and P. Crews, *J. Nat. Prod.*, 1995, **58**, 27-36, doi: 10.1021/np50115a003.
- 72 K. W. L. Yong, J. J. De Voss, J. N. A. Hooper and M. J. Garson, *J. Nat. Prod.*, 2011, **74**, 194-207, doi: 10.1021/np100620x.
- 73 B. Barnych and J.-M. Vatile, *Org. Lett.*, 2012, **14**, 564-567, doi: 10.1021/ol203185f.
- 74 A. D. Rodríguez and O. M. Cobar, *Tetrahedron*, 1995, **51**, 6869-6880, doi: 10.1016/0040-4020(95)00339-a.
- 75 C. A. Ospina, A. D. Rodríguez, E. Ortega-Barria and T. L. Capson, *J. Nat. Prod.*, 2003, **66**, 357-363, doi: 10.1021/np0204500.
- 76 T. A. Holt, D. S. Reddy, D. B. Huple, L. M. West, A. D. Rodríguez, M. T. Crimmins and A. G. Kutateladze, *J. Org. Chem.*, 2020, **85**, 6201-6205, doi: 10.1021/acs.joc.0c00555.
- 77 M. T. Crimmins, M. C. Mans and A. D. Rodríguez, *Org. Lett.*, 2010, **12**, 5028-5031, doi: 10.1021/ol102169w.
- 78 C. A. Ospina and A. D. Rodríguez, *J. Nat. Prod.*, 2006, **69**, 1721-1727, doi: 10.1021/np060317y.
- 79 A. D. Rodríguez and O. M. Cobar, *Chem. Pharm. Bull.*, 1995, **43**, 1853-1858, doi: 10.1248/cpb.43.1853.
- 80 P. Fu and J. B. MacMillan, *J. Nat. Prod.*, 2015, **78**, 548-551, doi: 10.1021/np500929z.
- 81 T. Seitz, P. Fu, F.-L. Haut, L. Adam, M. Habicht, D. Lentz, J. B. MacMillan and M. Christmann, *Org. Lett.*, 2016, **18**, 3070-3073, doi: 10.1021/acs.orglett.6b01166.
- 82 I. N'Diaye, G. Guella, I. Mancini and F. Pietra, *Tetrahedron Lett.*, 1996, **37**, 3049-3050, doi: 10.1016/0040-4039(96)00466-2.
- 83 F. Miyake, M. Hashimoto, S. Tonsiengsom, K. Yakushijin and D. A. Horne, *Tetrahedron*, 2010, **66**, 4888-4893, doi: 10.1016/j.tet.2010.03.109.
- 84 S. A. Morris and R. J. Andersen, *Tetrahedron*, 1990, **46**, 715-720, doi: 10.1016/s0040-4020(01)81355-7.
- 85 N. E. Golantsov, A. A. Festa, A. V. Varlamov and L. G. Voskressensky, *Synthesis*, 2017, **49**, 2562-2574, doi: 10.1055/s-0036-1588731.
- 86 T. Hertiani, R. Edrada-Ebel, S. Ortlepp, R. W. M. van Soest, N. J. de Voogd, V. Wray, U. Hentschel, S. Kozytska, W. E. G. Mueller and P. Proksch, *Bioorg. Med. Chem.*, 2010, **18**, 1297-1311, doi: 10.1016/j.bmc.2009.12.028.
- 87 B. Paulsen, K. A. Fredriksen, D. Petersen, L. Maes, A. Matheussen, A.-O. Naemi, A. A. Scheie, R. Simm, R. Ma, B. Wan, S. Franzblau and L.-L. Gundersen, *Bioorg. Med. Chem.*, 2019, **27**, 620-629, doi: 10.1016/j.bmc.2019.01.002.
- 88 Y.-Y. Li, M.-Z. Wang, Y.-J. Huang and Y.-M. Shen, *Mycology*, 2010, **1**, 254-261, doi: 10.1080/21501203.2010.529583.
- 89 J. McNulty and D. McLeod, *Eur. J. Org. Chem.*, 2017, **2017**, 29-33, doi: 10.1002/ejoc.201601172.
- 90 T. P. Wyche, J. S. Piotrowski, Y. Hou, D. Braun, R. Deshpande, S. McIlwain, I. M. Ong, C. L. Myers, I. A. Guzei, W. M. Westler, D. R. Andes and T. S. Bugni, *Angew. Chem., Int. Ed.*, 2014, **53**, 11583-11586, doi: 10.1002/anie.201405990.
- 91 F. Zhang, T. P. Wyche, Y. Zhu, D. R. Braun, J.-X. Yan, S. Chanana, Y. Ge, I. A. Guzei, M. G. Chevrette, C. R. Currie, M. G. Thomas, S. R. Rajski and T. S. Bugni, *Org. Lett.*, 2020, **22**, 1275-1279, doi: 10.1021/acs.orglett.9b04535.
- 92 S. P. B. Ovenden and R. J. Capon, *J. Nat. Prod.*, 1999, **62**, 1246-1249, doi: 10.1021/np9901027.
- 93 S. Sala, G. L. Nealon, A. N. Sobolev, J. Fromont, O. Gomez and G. R. Flematti, *J. Nat. Prod.*, 2020, **83**, 105-110, doi: 10.1021/acs.jnatprod.9b00902.
- 94 D. C. Holland, M. J. Kiefel and A. R. Carroll, *J. Org. Chem.*, 2020, **85**, 3490-3496, doi: 10.1021/acs.joc.9b03221.
- 95 P. Neupane, A. A. Salim and R. J. Capon, *Tetrahedron Lett.*, 2020, **61**, 151651, doi: 10.1016/j.tetlet.2020.151651.
- 96 A. R. Díaz-Marrero, I. Brito, J. M. de la Rosa, J. Darias and M. Cueto, *Tetrahedron*, 2008, **64**, 10821-10824, doi: 10.1016/j.tet.2008.09.027.

- 97 N. Huwyler and E. M. Carreira, *Angew. Chem., Int. Ed.*, 2012, **51**, 13066-13069, doi: 10.1002/anie.201207203.
- 98 A. G. Kutateladze and D. S. Reddy, *J. Org. Chem.*, 2017, **82**, 3368-3381, doi: 10.1021/acs.joc.7b00188.
- 99 C. S. Vairappan, M. Daitoh, M. Suzuki, T. Abe and M. Masuda, *Phytochemistry*, 2001, **58**, 291-297, doi: 10.1016/s0031-9422(01)00243-6.
- 100 R. R. Izac and J. J. Sims, *J. Am. Chem. Soc.*, 1979, **101**, 6136-6137, doi: 10.1021/ja00514a054.
- 101 G. M. König and A. D. Wright, *J. Nat. Prod.*, 1997, **60**, 967-970, doi: 10.1021/np970181r.
- 102 M. Alam, P. Sharma, A. S. Zektzer, G. E. Martin, X. Ji and D. Van der Helm, *J. Org. Chem.*, 1989, **54**, 1896-1900, doi: 10.1021/jo00269a027.
- 103 D. Friedrich and L. A. Paquette, *J. Nat. Prod.*, 2002, **65**, 126-130, doi: 10.1021/np0103822.
- 104 J. S. Clark, L. Delion and L. J. Farrugia, *Chem. - Eur. J.*, 2015, **21**, 4772-4780, doi: 10.1002/chem.201406051.
- 105 K. L. McPhail, D. France, S. Cornell-Kennon and W. H. Gerwick, *J. Nat. Prod.*, 2004, **67**, 1010-1013, doi: 10.1021/np0400252.
- 106 P. García-Domínguez, I. Lepore, C. Erb, H. Gronemeyer, L. Altucci, R. Álvarez and Á. R. de Lera, *Org. Biomol. Chem.*, 2011, **9**, 6979-6987, doi: 10.1039/c1ob05932g.
- 107 J. Rodríguez, B. M. Peters, L. Kurz, R. C. Schatzman, D. McCarley, L. Lou and P. Crews, *J. Am. Chem. Soc.*, 1993, **115**, 10436-10437, doi: 10.1021/ja00075a100.
- 108 J. Rodríguez and P. Crews, *Tetrahedron Lett.*, 1994, **35**, 4719-4722, doi: 10.1016/s0040-4039(00)76950-4.
- 109 Z. Meng and A. Fürstner, *J. Am. Chem. Soc.*, 2020, **142**, 11703-11708, doi: 10.1021/jacs.0c05347.
- 110 A. D. Rodriguez, J. J. Soto and I. C. Pina, *J. Nat. Prod.*, 1995, **58**, 1209-1216, doi: 10.1021/np50122a008.
- 111 A. D. Rodriguez, J. J. Soto and C. L. Barnes, *J. Org. Chem.*, 2000, **65**, 7700-7702, doi: 10.1021/jo000996w.
- 112 L. Zhu, Y. Liu, R. Ma and R. Tong, *Angew. Chem., Int. Ed.*, 2015, **54**, 627-632, doi: 10.1002/anie.201409618.
- 113 L. Zhu and R. Tong, *Synlett*, 2015, **26**, 1643-1648, doi: 10.1055/s-0034-1380616.
- 114 L. Zhu and R. Tong, *Org. Lett.*, 2015, **17**, 1966-1969, doi: 10.1021/acs.orglett.5b00700.
- 115 R. Jadulco, P. Proksch, V. Wray, Sudarsono, A. Berg and U. Gräfe, *J. Nat. Prod.*, 2001, **64**, 527-530, doi: 10.1021/np000401s.
- 116 F.-Z. Zhang, X.-M. Li, S.-Q. Yang, L.-H. Meng and B.-G. Wang, *J. Nat. Prod.*, 2019, **82**, 1535-1541, doi: 10.1021/acs.jnatprod.8b01091.
- 117 A. Cutignano, G. Nuzzo, D. D'Angelo, E. Borbone, A. Fusco and A. Fontana, *Angew. Chem., Int. Ed.*, 2013, **52**, 9256-9260, doi: 10.1002/anie.201303039.
- 118 B. Seetharamsingh, P. R. Rajamohan and D. S. Reddy, *Org. Lett.*, 2015, **17**, 1652-1655, doi: 10.1021/acs.orglett.5b00345.
- 119 S. Das, T. K. Kuliya and R. K. Goswami, *J. Org. Chem.*, 2015, **80**, 6467-6489, doi: 10.1021/acs.joc.5b00972.
- 120 K. Nageswara Rao, K. Kumar and S. Ghosh, *Eur. J. Org. Chem.*, 2018, **2018**, 398-412, doi: 10.1002/ejoc.201701562.
- 121 H. Li, C. L. M. Gilchrist, H. J. Lacey, A. Crombie, D. Vuong, J. I. Pitt, E. Lacey, Y.-H. Chooi and A. M. Piggott, *Org. Lett.*, 2019, **21**, 1287-1291, doi: 10.1021/acs.orglett.8b04042.
- 122 J. Li, M. Chen, X. Hao, S. Li, F. Li, L. Yu, C. Xiao and M. Gan, *Org. Lett.*, 2020, **22**, 98-101, doi: 10.1021/acs.orglett.9b04008.
- 123 L. Garrido, E. Zubía, M. J. Ortega and J. Salvá, *J. Org. Chem.*, 2003, **68**, 293-299, doi: 10.1021/jo020487p.
- 124 M. Matveenko, G. Liang, E. M. W. Lauterwasser, E. Zubía and D. Trauner, *J. Am. Chem. Soc.*, 2012, **134**, 9291-9295, doi: 10.1021/ja301326k.
- 125 Y. Momoi, K.-i. Okuyama, H. Toya, K. Sugimoto, K. Okano and H. Tokuyama, *Angew. Chem., Int. Ed.*, 2014, **53**, 13215-13219, doi: 10.1002/anie.201407686.
- 126 A. J. Blackman and R. D. Green, *Aust. J. Chem.*, 1987, **40**, 1655-1662, doi: 10.1071/ch9871655.
- 127 A. R. Carroll, S. Duffy, M. Sykes and V. M. Avery, *Org. Biomol. Chem.*, 2011, **9**, 604-609, doi: 10.1039/c0ob00538j.
- 128 F. A. Khan and S. Ahmad, *J. Org. Chem.*, 2012, **77**, 2389-2397, doi: 10.1021/jo3000173.
- 129 S. Ahmad, S. Choudhury and F. A. Khan, *Tetrahedron*, 2015, **71**, 4192-4202, doi: 10.1016/j.tet.2015.04.091.
- 130 S. Rubnov, C. Chevallier, O. Thoison, C. Debitus, O. Laprevote, D. Guénard and T. Sévenet, *Nat. Prod. Res.*, 2005, **19**, 75-79, doi: 10.1080/1478641042000199851.
- 131 M. I. Mitova, G. Lang, J. Wiese and J. F. Imhoff, *J. Nat. Prod.*, 2008, **71**, 824-827, doi: 10.1021/np800032a.
- 132 Z. Yang, X. Jin, M. Guaciario, B. F. Molino, U. Mocek, R. Reategui, J. Rhea and T. Morley, *Org. Lett.*, 2011, **13**, 5436-5439, doi: 10.1021/ol202005u.

- 133 J.-Y. Chen, C.-Y. Huang, Y.-S. Lin, T.-L. Hwang, W.-L. Wang, S.-F. Chiou and J.-H. Sheu, *J. Nat. Prod.*, 2016, **79**, 2315-2323, doi: 10.1021/acs.jnatprod.6b00452.
- 134 M. Sun, X. Zhang, H. Hao, W. Li and C. Lu, *J. Nat. Prod.*, 2015, **78**, 2123-2127, doi: 10.1021/acs.jnatprod.5b00031.
- 135 T. Kim, S.-A. Lee, T. Noh, P. Choi, S.-J. Choi, B. G. Song, Y. Kim, Y.-T. Park, G. Huh, Y.-J. Kim and J. Ham, *J. Nat. Prod.*, 2019, **82**, 1325-1330, doi: 10.1021/acs.jnatprod.9b00072.
- 136 W.-T. Li, D. Luo, J.-N. Huang, L.-L. Wang, F.-G. Zhang, T. Xi, J.-M. Liao and Y.-Y. Lu, *Nat. Prod. Res.*, 2018, **32**, 662-667, doi: 10.1080/14786419.2017.1335730.
- 137 K. Banert and D. J. Tantillo, *Nat. Prod. Res.*, 2019, **33**, 3011-3015, doi: 10.1080/14786419.2018.1509330.
- 138 K. Watanabe, Y. Tsuda, M. Hamada, M. Omori, G. Mori, K. Iguchi, H. Naoki, T. Fujita and R. W. M. Van Soest, *J. Nat. Prod.*, 2005, **68**, 1001-1005, doi: 10.1021/np040233u.
- 139 P. Gangadhar, S. Ramakrishna, P. Venkateswarlu and P. Srihari, *Beilstein J. Org. Chem.*, 2018, **14**, 2313-2320, doi: 10.3762/bjoc.14.206.
- 140 J. Wu, Q. Xiao, S. Zhang, X. Li, Z. Xiao, H. Ding and Q. Li, *Tetrahedron*, 2005, **61**, 8382-8389, doi: 10.1016/j.tet.2005.06.099.
- 141 Z.-F. Zhou, L.-Y. Kong, T. Kurtán, H.-L. Liu, A. Mándi, J. Li, Y.-C. Gu and Y.-W. Guo, *Planta Med.*, 2014, **80**, 949-954, doi: 10.1055/s-0034-1382840.
- 142 J. Wang, A. N. Pearce, S. T. S. Chan, R. B. Taylor, M. J. Page, A. Valentin, M.-L. Bourguet-Kondracki, J. P. Dalton, S. Wiles and B. R. Copp, *J. Nat. Prod.*, 2016, **79**, 607-610, doi: 10.1021/acs.jnatprod.5b00770.
- 143 D.-Y. Sun, G.-Y. Han, J.-X. Gong, B. Nay, X.-W. Li and Y.-W. Guo, *Org. Lett.*, 2017, **19**, 714-717, doi: 10.1021/acs.orglett.6b03892.
- 144 S.-Y. Cheng, S.-K. Wang, M.-K. Hsieh and C.-Y. Duh, *Int. J. Mol. Sci.*, 2015, **16**, 6140-6152, doi: 10.3390/ijms16036140.
- 145 G. Li, H. Li, Q. Zhang, M. Yang, Y.-C. Gu, L.-F. Liang, W. Tang and Y.-W. Guo, *J. Org. Chem.*, 2019, **84**, 5091-5098, doi: 10.1021/acs.joc.9b00030.
- 146 T. Yamada, M. Iritani, K. Minoura, K. Kawai and A. Numata, *Org. Biomol. Chem.*, 2004, **2**, 2131-2135, doi: 10.1039/B404459B.
- 147 T. Yamada, M. Doi, A. Miura, W. Harada, M. Hiramura, K. Minoura, R. Tanaka and A. Numata, *J. Antibiot.*, 2005, **58**, 185-191, doi: 10.1038/ja.2005.21.
- 148 H. P. Kalmode, K. L. Handore, R. Rajput, S. R. Shaikh, R. G. Gonnade, K. A. Kulkarni and D. S. Reddy, *Org. Lett.*, 2018, **20**, 7003-7006, doi: 10.1021/acs.orglett.8b02838.
- 149 P. R. Athawale, H. P. Kalmode, Z. Motiwala, K. A. Kulkarni and D. S. Reddy, *Org. Lett.*, 2020, **22**, 3104-3109, doi: 10.1021/acs.orglett.0c00857.
- 150 H. Koshino, H. Satoh, T. Yamada and Y. Esumi, *Tetrahedron Lett.*, 2006, **47**, 4623-4626, doi: 10.1016/j.tetlet.2006.04.139.
- 151 E. Fahy, T. F. Molinski, M. K. Harper, B. W. Sullivan, D. J. Faulkner, L. Parkanyi and J. Clardy, *Tetrahedron Lett.*, 1988, **29**, 3427-3428, doi: 10.1016/0040-4039(88)85180-3.
- 152 T. S. McDermott, A. Mortlock and C. H. Heathcock, *J. Org. Chem.*, 1996, **61**, 700-709, doi: 10.1021/jo951647i.
- 153 H.-B. Liu, G. H. Imler, K. K. Baldrige, R. D. O'Connor, J. S. Siegel, J. R. Deschamps and C. A. Bewley, *J. Am. Chem. Soc.*, 2020, **142**, 2755-2759, doi: 10.1021/jacs.9b12926.
- 154 A. Rudi, R. Afanii, L. G. Gravalos, M. Akin, E. Gaydou, J. Vacelet and Y. Kashman, *J. Nat. Prod.*, 2003, **66**, 682-685, doi: 10.1021/np020589a.
- 155 M. Suzuki, Y. Takahashi, Y. Mitome, T. Itoh, T. Abe and M. Masuda, *Phytochemistry*, 2002, **60**, 861-867, doi: 10.1016/s0031-9422(02)00151-6.
- 156 W. Jeong, M. J. Kim, H. Kim, S. Kim, D. Kim and K. J. Shin, *Angew. Chem., Int. Ed.*, 2010, **49**, 752-756, doi: 10.1002/anie.200905826.
- 157 A. R. Pereira, Z. Cao, N. Engene, I. E. Soria-Mercado, T. F. Murray and W. H. Gerwick, *Org. Lett.*, 2010, **12**, 4490-4493, doi: 10.1021/ol101752n.
- 158 R. Tello-Aburto, E. M. Johnson, C. K. Valdez and W. A. Maio, *Org. Lett.*, 2012, **14**, 2150-2153, doi: 10.1021/ol300673m.
- 159 R. Tello-Aburto, T. D. Newar and W. A. Maio, *J. Org. Chem.*, 2012, **77**, 6271-6289, doi: 10.1021/jo301121f.
- 160 A. D. Wadsworth, D. P. Furkert, J. Sperry and M. A. Brimble, *Org. Lett.*, 2012, **14**, 5374-5377, doi: 10.1021/ol3025956.
- 161 T. S. Bugni, J. E. Janso, R. T. Williamson, X. Feng, V. S. Bernan, M. Greenstein, G. T. Carter, W. M. Maiese and C. M. Ireland, *J. Nat. Prod.*, 2004, **67**, 1396-1399, doi: 10.1021/np049973t.
- 162 A. R. Burns, G. D. McAllister, S. E. Shanahan and R. J. K. Taylor, *Angew. Chem., Int. Ed.*, 2010, **49**, 5574-5577, doi:

10.1002/anie.201002416.

- 163 W. M. Abdel-Mageed, R. Ebel, F. A. Valeriotte and M. Jaspars, *Tetrahedron*, 2010, **66**, 2855-2862, doi: 10.1016/j.tet.2010.02.041.
- 164 H. S. S. Chan, A. L. Thompson, K. E. Christensen and J. W. Burton, *Chem. Sci.*, 2020, 11592-11600, doi: 10.1039/d0sc04120c.
- 165 L. T. Tan, B. L. Márquez and W. H. Gerwick, *J. Nat. Prod.*, 2002, **65**, 925-928, doi: 10.1021/np010526c.
- 166 A. ElMarrouni, R. Lebeuf, J. Gebauer, M. Heras, S. Arseniyadis and J. Cossy, *Org. Lett.*, 2012, **14**, 314-317, doi: 10.1021/ol203064r.
- 167 X.-H. Yan, M. Gavagnin, G. Cimino and Y.-W. Guo, *Tetrahedron Lett.*, 2007, **48**, 5313-5316, doi: 10.1016/j.tetlet.2007.05.096.
- 168 X.-H. Yan, Z.-Y. Li and Y.-W. Guo, *Helv. Chim. Acta*, 2007, **90**, 1574-1580, doi: 10.1002/hlca.200790164.
- 169 H. Takamura, T. Kikuchi, N. Endo, Y. Fukuda and I. Kadota, *Org. Lett.*, 2016, **18**, 2110-2113, doi: 10.1021/acs.orglett.6b00737.
- 170 H. Takamura, T. Kikuchi, K. Iwamoto, E. Nakao, N. Harada, T. Otsu, N. Endo, Y. Fukuda, O. Ohno, K. Suenaga, Y.-W. Guo and I. Kadota, *J. Org. Chem.*, 2018, **83**, 11028-11056, doi: 10.1021/acs.joc.8b01634.
- 171 M. Zhang, K. Long, K. Ma, X. Huang and H. Wu, *J. Nat. Prod.*, 1995, **58**, 414-418, doi: 10.1021/np50117a010.
- 172 L.-F. Liang, T. Kurtán, A. Mándi, L.-X. Gao, J. Li, W. Zhang and Y.-W. Guo, *Eur. J. Org. Chem.*, 2014, **2014**, 1841-1847, doi: 10.1002/ejoc.201301683.
- 173 L.-F. Liang, L.-F. Lan, O. Tagliatalata-Scafati and Y.-W. Guo, *Tetrahedron*, 2013, **69**, 7381-7386, doi: 10.1016/j.tet.2013.06.068.
- 174 L.-F. Liang, T. Kurtán, A. Mándi, L.-G. Yao, J. Li, L.-F. Lan and Y.-W. Guo, *Tetrahedron*, 2018, **74**, 1933-1941, doi: 10.1016/j.tet.2018.02.059.
- 175 R. Jia, T. Kurtán, A. Mándi, X.-H. Yan, W. Zhang and Y.-W. Guo, *J. Org. Chem.*, 2013, **78**, 3113-3119, doi: 10.1021/jo400069n.
- 176 M.-J. Xu, X.-J. Liu, Y.-L. Zhao, D. Liu, Z.-H. Xu, X.-M. Lang, P. Ao, W.-H. Lin, S.-L. Yang, Z.-G. Zhang and J. Xu, *Mar. Drugs*, 2012, **10**, 639-654, doi: 10.3390/md10030639.
- 177 Z.-Y. You, Y.-H. Wang, Z.-G. Zhang, M.-J. Xu, S.-J. Xie, T.-S. Han, L. Feng, X.-G. Li and J. Xu, *Mar. Drugs*, 2013, **11**, 4035-4049, doi: 10.3390/md11104035.
- 178 X. Jiao, Y. Yao, B. Yang, X. Liu, X. Li, H. Yang, L. Li, J. Xu, M. Xu and P. Xie, *Org. Biomol. Chem.*, 2016, **14**, 1805-1813, doi: 10.1039/c5ob02476e.
- 179 Y.-Y. Yao, X.-Y. Liu, X.-Y. Li, H.-G. Yang, L. Li, X.-Z. Jiao and P. Xie, *J. Asian Nat. Prod. Res.*, 2016, **18**, 976-987, doi: 10.1080/10286020.2016.1188808.
- 180 X.-D. Li, W. Ding, F.-P. Miao and N.-Y. Ji, *Magn. Reson. Chem.*, 2012, **50**, 174-177, doi: 10.1002/mrc.2870.
- 181 X.-Q. Yu, C.-S. Jiang, Y. Zhang, P. Sun, T. Kurtán, A. Mándi, X.-L. Li, L.-G. Yao, A.-H. Liu, B. Wang, Y.-W. Guo and S.-C. Mao, *Phytochemistry*, 2017, **136**, 81-93, doi: 10.1016/j.phytochem.2017.01.007.
- 182 C. S. Vairappan, M. Suzuki, T. Abe and M. Masuda, *Phytochemistry*, 2001, **58**, 517-523, doi: 10.1016/s0031-9422(01)00260-6.
- 183 J. Kimura, N. Kamada and Y. Tsujimoto, *Bull. Chem. Soc. Jpn.*, 1999, **72**, 289-292, doi: 10.1246/bcsj.72.289.
- 184 D. E. Barnekow, J. H. Cardellina, II, A. S. Zektzer and G. E. Martin, *J. Am. Chem. Soc.*, 1989, **111**, 3511-3517, doi: 10.1021/ja00192a004.
- 185 Y. Peng, S.-J. Ni, J. Li and M.-Y. Li, *Phytochem. Lett.*, 2017, **21**, 38-41, doi: 10.1016/j.phytol.2017.05.018.
- 186 Y. Peng and M.-Y. Li, *Nat. Prod. Res. Dev.*, 2016, **28**, 1870-1874.
- 187 X. Zhang, W. Li, L. Shen and J. Wu, *Fitoterapia*, 2018, **124**, 1-7, doi: 10.1016/j.fitote.2017.09.019.
- 188 Y. Zhang, Z. Deng, T. Gao, P. Proksch and W. Lin, *Phytochemistry*, 2005, **66**, 1465-1471, doi: 10.1016/j.phytochem.2005.04.018.
- 189 D. A. Dias and S. Urban, *Phytochemistry*, 2011, **72**, 2081-2089, doi: 10.1016/j.phytochem.2011.06.012.
- 190 S. Lee, M. Hoshino, M. Fujita and S. Urban, *Chem. Sci.*, 2017, **8**, 1547-1550, doi: 10.1039/c6sc04288k.
- 191 W. Guo, D. Li, J. Peng, T. Zhu, Q. Gu and D. Li, *J. Nat. Prod.*, 2015, **78**, 306-310, doi: 10.1021/np500586r.
- 192 M. Cheng, P. Li, Y. Jiang, X. Tang, W. Zhang, Q. Wang and G. Li, *J. Nat. Prod.*, 2021, **84**, 1345-1352, doi: 10.1021/acs.jnatprod.1c00082.
- 193 J. Wu, S. Zhang, T. Bruhn, Q. Xiao, H. Ding and G. Bringmann, *Chem. - Eur. J.*, 2008, **14**, 1129-1144, doi: 10.1002/chem.200700663.
- 194 A. W. Schuppe, Y. Zhao, Y. Liu and T. R. Newhouse, *J. Am. Chem. Soc.*, 2019, 9191-9196, doi: 10.1021/jacs.9b04508.
- 195 Y. Liu, T. A. Holt, A. Kutateladze and T. R. Newhouse, *Chirality*, 2020, **32**, 515-523, doi: 10.1002/chir.23189.
- 196 K. Ofuji, M. Satake, T. McMahon, J. Silke, K. J. James, H. Naoki, Y. Oshima and T. Yasumoto, *Nat. Toxins*, 1999, **7**, 99-102, doi: 10.1002/(sici)1522-7189(199905/06)7:3<99::aid-nt46>3.0.co;2-l.
- 197 K. C. Nicolaou, M. O. Frederick, G. Petrovic, K. P. Cole and E. Z. Loizidou, *Angew. Chem., Int. Ed.*, 2006, **45**, 2609-2615, doi: 10.1002/anie.200600295.

- 198 N. T. Kenton, D. Adu-Ampratwum, A. A. Okumu, Z. Zhang, Y. Chen, S. Nguyen, J. Xu, Y. Ding, P. McCarron, J. Kilcoyne, F. Rise, A. L. Wilkins, C. O. Miles and C. J. Forsyth, *Angew. Chem., Int. Ed.*, 2018, **57**, 805-809, doi: 10.1002/anie.201711006.
- 199 N. T. Kenton, D. Adu-Ampratwum, A. A. Okumu, P. McCarron, J. Kilcoyne, F. Rise, A. L. Wilkins, C. O. Miles and C. J. Forsyth, *Angew. Chem., Int. Ed.*, 2018, **57**, 810-813, doi: 10.1002/anie.201711008.
- 200 S. U. Lee, Y. Asami, D. Lee, J.-H. Jang, J. S. Ahn and H. Oh, *J. Nat. Prod.*, 2011, **74**, 1284-1287, doi: 10.1021/np100880b.
- 201 P. Lorenzo, R. Álvarez and Á. R. de Lera, *Eur. J. Org. Chem.*, 2014, **2014**, 2557-2564, doi: 10.1002/ejoc.201400029.
- 202 X. Li, Y. Yao, Y. Zheng, I. Sattler and W. Lin, *Arch. Pharmacol. Res.*, 2007, **30**, 812-815, doi: 10.1007/bf02978829.
- 203 J. Wang and R. Tong, *J. Org. Chem.*, 2016, **81**, 4325-4339, doi: 10.1021/acs.joc.6b00788.
- 204 J. Wang and R. Tong, *Org. Chem. Front.*, 2017, **4**, 140-146, doi: 10.1039/c6qo00556j.
- 205 W.-L. Mei, B. Zheng, Y.-X. Zhao, H.-M. Zhong, X.-L. W. Chen, Y.-B. Zeng, W.-H. Dong, J.-L. Huang, P. Proksch and H.-F. Dai, *Mar. Drugs*, 2012, **10**, 1993-2001, doi: 10.3390/md10091993.
- 206 T. Kobayashi, I. Takizawa, A. Shinobe, Y. Kawamoto, H. Abe and H. Ito, *Org. Lett.*, 2019, **21**, 3008-3012, doi: 10.1021/acs.orglett.9b00486.
- 207 A. S. R. Anjaneyulu, P. M. Gowri, M. J. R. V. Venugopal, P. Sarada, M. V. R. K. Murthy, G. V. Rao, P. S. N. Murthy, C. V. Rao and G. Kumar, *J. Indian Chem. Soc.*, 1999, **76**, 651-659.
- 208 C. He, J. Xuan, P. Rao, P.-P. Xie, X. Hong, X. Lin and H. Ding, *Angew. Chem., Int. Ed.*, 2019, **58**, 5100-5104, doi: 10.1002/anie.201900782.
- 209 A. Trianto, I. Hermawan, N. J. de Voogd and J. Tanaka, *Chem. Pharm. Bull.*, 2011, **59**, 1311-1313, doi: 10.1248/cpb.59.1311.
- 210 C. Pooch and M. Kalesse, *Chem. - Eur. J.*, 2021, **27**, 1615-1619, doi: 10.1002/chem.202004847.
- 211 N. Tsuji and K. Nagashima, *Tetrahedron*, 1970, **26**, 5719-5729, doi: 10.1016/0040-4020(70)80008-4.
- 212 Y. Dong, W. Ding, C. Sun, X. Ji, C. Ling, Z. Zhou, Z. Chen, X. Chen and J. Ju, *Chem. Biodiversity*, 2020, **17**, e2000057, doi: 10.1002/cbdv.202000057.
- 213 J. P. Torres, Z. Lin, D. S. Fenton, L. U. Leavitt, C. Niu, P.-Y. Lam, J. M. Robes, R. T. Peterson, G. P. Concepcion, M. G. Haygood, B. M. Olivera and E. W. Schmidt, *J. Nat. Prod.*, 2020, **83**, 1249-1257, doi: 10.1021/acs.jnatprod.0c00038.
- 214 F. Han, G. Liu, X. Zhang, Y. Ding, L. Wang, Y. Wu, Y. Chen and Q. Zhang, *Org. Lett.*, 2021, **23**, 4976-4980, doi: 10.1021/acs.orglett.1c01382.
- 215 W. P. Frankmölle, G. Knübel, R. E. Moore and G. M. L. Patterson, *J. Antibiot.*, 1992, **45**, 1458-1466, doi: 10.7164/antibiotics.45.1458.
- 216 I. Bonnard, M. Rolland, C. Francisco and B. Banaigs, *Letts. Pept. Sci.*, 1997, **4**, 289-292, doi: 10.1007/bf02442891.
- 217 F. Boyaud, Z. Mahiout, C. Lenoir, S. Tang, J. Wdzieczak-Bakala, A. Witczak, I. Bonnard, B. Banaigs, T. Ye and N. Inguibert, *Org. Lett.*, 2013, **15**, 3898-3901, doi: 10.1021/ol401645m.
- 218 P. Pruksakorn, M. Arai, N. Kotoku, C. Vilchère, A. D. Baughn, P. Moodley, W. R. Jacobs, Jr. and M. Kobayashi, *Bioorg. Med. Chem. Lett.*, 2010, **20**, 3658-3663, doi: 10.1016/j.bmcl.2010.04.100.
- 219 I. Kavianinia, L. Kunalingam, P. W. R. Harris, G. M. Cook and M. A. Brimble, *Org. Lett.*, 2016, **18**, 3878-3881, doi: 10.1021/acs.orglett.6b01886.
- 220 R. Talpir, A. Rudi, Y. Kashman, Y. Loya and A. Hizi, *Tetrahedron*, 1994, **50**, 4179-4184, doi: 10.1016/s0040-4020(01)86712-0.
- 221 S. A. Snyder, D. S. Treitler and A. P. Brucks, *J. Am. Chem. Soc.*, 2010, **132**, 14303-14314, doi: 10.1021/ja106813s.
- 222 M. J. Balunas, M. F. Grosso, F. A. Villa, N. Engene, K. L. McPhail, K. Tidgewell, L. M. Pineda, L. Gerwick, C. Spadafora, D. E. Kyle and W. H. Gerwick, *Org. Lett.*, 2012, **14**, 3878-3881, doi: 10.1021/ol301607q.
- 223 V. M. T. Carneiro, C. M. Avila, M. J. Balunas, W. H. Gerwick and R. A. Pilli, *J. Org. Chem.*, 2014, **79**, 630-642, doi: 10.1021/jo402339y.
- 224 J. Arunpanichlert, V. Rukachaisirikul, Y. Sukpondma, S. Phongpaichit, O. Supaphon and J. Sakayaroj, *Arch. Pharmacol. Res.*, 2011, **34**, 1633-1637, doi: 10.1007/s12272-011-1007-1.
- 225 P. Saetang, V. Rukachaisirikul, S. Phongpaichit, J. Sakayaroj, X. Shi, J. Chen and X. Shen, *Tetrahedron*, 2016, **72**, 6421-6427, doi: 10.1016/j.tet.2016.08.048.
- 226 J. Gaddam, G. S. Reddy, K. Marumudi, A. C. Kunwar, J. S. Yadav and D. K. Mohapatra, *Org. Biomol. Chem.*, 2019, **17**, 5601-5614, doi: 10.1039/c9ob00838a.
- 227 M. Akakabe, K. Kumagai, M. Tsuda, Y. Konishi, A. Tominaga, M. Tsuda, E. Fukushi and J. Kawabata, *Tetrahedron Lett.*, 2014, **55**, 3491-3494, doi: 10.1016/j.tetlet.2014.04.086.



- 228 M. Kanto and M. Sasaki, *Org. Lett.*, 2016, **18**, 112-115, doi: 10.1021/acs.orglett.5b03346.
- 229 M. Kanto, S. Sato, M. Tsuda and M. Sasaki, *J. Org. Chem.*, 2016, **81**, 9105-9121, doi: 10.1021/acs.joc.6b01700.
- 230 B. Sullivan, P. Djura, D. E. McIntyre and D. J. Faulkner, *Tetrahedron*, 1981, **37**, 979-982, doi: 10.1016/s0040-4020(01)97672-0.
- 231 B. W. Sullivan, D. J. Faulkner, G. K. Matsumoto, C. H. He and J. Clardy, *J. Org. Chem.*, 1986, **51**, 4568-4573, doi: 10.1021/jo00374a015.
- 232 A. W. Markwell-Heys, K. K. W. Kuan and J. H. George, *Org. Lett.*, 2015, **17**, 4228-4231, doi: 10.1021/acs.orglett.5b01973.
- 233 A. Qureshi and D. J. Faulkner, *J. Nat. Prod.*, 2000, **63**, 841-842, doi: 10.1021/np9905665.
- 234 A.-Y. Shin, H.-S. Lee, Y.-J. Lee, J. S. Lee, A. Son, C. Choi and J. Lee, *Mar. Drugs*, 2020, **18**, 607, doi: 10.3390/md18120607.
- 235 J. Peng, A. R. Place, W. Yoshida, C. Anklin and M. T. Hamann, *J. Am. Chem. Soc.*, 2010, **132**, 3277-3279, doi: 10.1021/ja9091853.
- 236 A. L. Waters, J. Oh, A. R. Place and M. T. Hamann, *Angew. Chem., Int. Ed.*, 2015, **54**, 15705-15710, doi: 10.1002/anie.201507418.
- 237 D. S. Dalisay, B. I. Morinaka, C. K. Skepper and T. F. Molinski, *J. Am. Chem. Soc.*, 2009, **131**, 7552-7553, doi: 10.1021/ja9024929.
- 238 Q. Xiao, K. Young and A. Zakarian, *J. Am. Chem. Soc.*, 2015, **137**, 5907-5910, doi: 10.1021/jacs.5b03531.
- 239 M. Suzuki, S. Nakano, Y. Takahashi, T. Abe and M. Masuda, *Phytochemistry*, 1999, **51**, 657-662, doi: 10.1016/s0031-9422(99)00102-8.
- 240 I. Shin, D. Lee and H. Kim, *Org. Lett.*, 2016, **18**, 4420-4423, doi: 10.1021/acs.orglett.6b02239.
- 241 J.-H. Sheu, A. F. Ahmed, R.-T. Shiue, C.-F. Dai and Y.-H. Kuo, *J. Nat. Prod.*, 2002, **65**, 1904-1908, doi: 10.1021/np020280r.
- 242 A. Saitman, P. Rulliere, S. D. E. Sullivan and E. A. Theodorakis, *Org. Lett.*, 2011, **13**, 5854-5857, doi: 10.1021/ol202476j.
- 243 S.-T. Lin, S.-K. Wang, S.-Y. Cheng and C.-Y. Duh, *Org. Lett.*, 2009, **11**, 3012-3014, doi: 10.1021/ol901070e.
- 244 F.-Z. Yin, L.-G. Yao, Z.-Y. Zhang, J.-R. Wang, H. Wang and Y.-W. Guo, *Tetrahedron*, 2021, **90**, 132204, doi: 10.1016/j.tet.2021.132204.
- 245 C.-Y. Huang, P.-J. Sung, C. Uvarani, J.-H. Su, M.-C. Lu, T.-L. Hwang, C.-F. Dai, S.-L. Wu and J.-H. Sheu, *Sci. Rep.*, 2015, **5**, 15624, doi: 10.1038/srep15624.
- 246 P. Sun, F.-Y. Cai, G. Lauro, H. Tang, L. Su, H.-L. Wang, H. H. Li, A. Mándi, T. Kurtán, R. Riccio, G. Bifulco and W. Zhang, *J. Nat. Prod.*, 2019, **82**, 1264-1273, doi: 10.1021/acs.jnatprod.8b01037.
- 247 S. Liu, H. Dai, G. Makhloufi, C. Heering, C. Janiak, R. Hartmann, A. Mándi, T. Kurtán, W. E. G. Mueller, M. U. Kassack, W. Lin, Z. Liu and P. Proksch, *J. Nat. Prod.*, 2016, **79**, 2332-2340, doi: 10.1021/acs.jnatprod.6b00473.
- 248 D. Paul, S. Saha and R. K. Goswami, *Org. Lett.*, 2018, **20**, 4606-4609, doi: 10.1021/acs.orglett.8b01894.
- 249 J. Sikorska, A. M. Hau, C. Anklin, S. Parker-Nance, M. T. Davies-Coleman, J. E. Ishmael and K. L. McPhail, *J. Org. Chem.*, 2012, **77**, 6066-6075, doi: 10.1021/jo3008622.
- 250 H. Lei, J. Yan, J. Yu, Y. Liu, Z. Wang, Z. Xu and T. Ye, *Angew. Chem., Int. Ed.*, 2014, **53**, 6533-6537, doi: 10.1002/anie.201403542.
- 251 J. Willwacher and A. Fürstner, *Angew. Chem., Int. Ed.*, 2014, **53**, 4217-4221, doi: 10.1002/anie.201400605.
- 252 J. Willwacher, B. Heggen, C. Wirtz, W. Thiel and A. Fürstner, *Chem. - Eur. J.*, 2015, **21**, 10416-10430, doi: 10.1002/chem.201501491.
- 253 K. M. Snyder, J. Sikorska, T. Ye, L. Fang, W. Su, R. G. Carter, K. L. McPhail and P. H.-Y. Cheong, *Org. Biomol. Chem.*, 2016, **14**, 5826-5831, doi: 10.1039/c6ob00707d.
- 254 M. R. Rao and D. J. Faulkner, *J. Nat. Prod.*, 2002, **65**, 386-388, doi: 10.1021/np010495l.
- 255 J. B. Son, S. N. Kim, N. Y. Kim, M.-h. Hwang, W. Lee and D. H. Lee, *Bull. Korean Chem. Soc.*, 2010, **31**, 653-663, doi: 10.5012/bkcs.2010.31.03.653.
- 256 H. Luesch, W. Y. Yoshida, G. G. Harrigan, J. P. Doom, R. E. Moore and V. J. Paul, *J. Nat. Prod.*, 2002, **65**, 1945-1948, doi: 10.1021/np0202879.
- 257 H. Fuwa, Y. Okuaki, N. Yamagata and M. Sasaki, *Angew. Chem., Int. Ed.*, 2015, **54**, 868-873, doi: 10.1002/anie.201409629.
- 258 H. Fuwa, *Strategies Tactics Org. Synth.*, 2016, **12**, 143-168, doi: 10.1016/b978-0-08-100756-3.00005-4.
- 259 S. Matthew, L. A. Salvador, P. J. Schupp, V. J. Paul and H. Luesch, *J. Nat. Prod.*, 2010, **73**, 1544-1552, doi: 10.1021/np1004032.
- 260 C.-F. Chang, E. Stefan and R. E. Taylor, *Chem. - Eur. J.*, 2015, **21**, 10681-10686, doi: 10.1002/chem.201502132.
- 261 K. Kumagai, M. Tsuda, A. Masuda, E. Fukushi and J. Kawabata, *Heterocycles*, 2015, **91**, 265-274, doi: 10.3987/com-14-13132.
- 262 K. Sakamoto, A. Hakamata, M. Tsuda and H. Fuwa, *Angew. Chem., Int. Ed.*, 2018, **57**, 3801-3805, doi: 10.1002/anie.201800507.
- 263 K. Sakamoto, A. Hakamata, A. Iwasaki, K. Suenaga, M. Tsuda and H. Fuwa, *Chem. - Eur. J.*, 2019, **25**, 8528-8542, doi: 10.1002/chem.201900813.
- 264 M. T. Jamison. Mangrolide A, a novel marine derived polyketide with selective antibiotic activity. The University of Texas

Southwestern Medical Center (US), May 2013.

- 265 H. Hattori, L. V. Hoff and K. Gademann, *Org. Lett.*, 2019, **21**, 3456-3459, doi: 10.1021/acs.orglett.9b01256.
- 266 G. J. Florence and J. Wloch, *Chem. - Eur. J.*, 2012, **18**, 14250-14254, doi: 10.1002/chem.201203067.
- 267 A. A. Sayyad, K. Kaim and K. P. Kaliappan, *Org. Biomol. Chem.*, 2020, **18**, 5937-5950, doi: 10.1039/d0ob01140a.
- 268 K. Vaithegi, A. B. Pawar and K. R. Prasad, *Tetrahedron*, 2021, **77**, 131768, doi: 10.1016/j.tet.2020.131768.
- 269 A. Tripathi, M. M. Schofield, G. E. Chlipala, P. J. Schultz, I. Yim, S. A. Newmister, T. D. Nusca, J. B. Scaglione, P. C. Hanna, G. Tamayo-Castillo and D. H. Sherman, *J. Am. Chem. Soc.*, 2014, **136**, 1579-1586, doi: 10.1021/ja4115924.
- 270 J. Wu, P. Lorenzo, S. Zhong, M. Ali, C. P. Butts, E. L. Myers and V. K. Aggarwal, *Nature*, 2017, **547**, 436-440, doi: 10.1038/nature23265.
- 271 S. Guchhait, S. Chatterjee, R. S. Ampapathi and R. K. Goswami, *J. Org. Chem.*, 2017, **82**, 2414-2435, doi: 10.1021/acs.joc.6b02838.
- 272 S. Paladugu, P. S. Mainkar and S. Chandrasekhar, *Tetrahedron Lett.*, 2017, **58**, 2784-2787, doi: 10.1016/j.tetlet.2017.06.011.
- 273 S. Sengupta, M. Bae, D.-C. Oh, U. Dash, H. J. Kim, W. Y. Song, I. Shin and T. Sim, *J. Org. Chem.*, 2017, **82**, 12947-12966, doi: 10.1021/acs.joc.7b01719.
- 274 M. Murata, S. Matsuoka, N. Matsumori, G. K. Paul and K. Tachibana, *J. Am. Chem. Soc.*, 1999, **121**, 870-871, doi: 10.1021/ja983655x.
- 275 M. Ebine, M. Kanemoto, Y. Manabe, Y. Konno, K. Sakai, N. Matsumori, M. Murata and T. Oishi, *Org. Lett.*, 2013, **15**, 2846-2849, doi: 10.1021/ol401176a.
- 276 Y. Wakamiya, M. Ebine, M. Murayama, H. Omizu, N. Matsumori, M. Murata and T. Oishi, *Angew. Chem., Int. Ed.*, 2018, **57**, 6060-6064, doi: 10.1002/anie.201712167.
- 277 Y. Wakamiya, M. Ebine, N. Matsumori and T. Oishi, *J. Am. Chem. Soc.*, 2020, **142**, 3472-3478, doi: 10.1021/jacs.9b11789.
- 278 J. Rodriguez, R. M. Nieto, M. Blanco, F. A. Valeriote, C. Jiménez and P. Crews, *Org. Lett.*, 2014, **16**, 464-467, doi: 10.1021/ol403350e.
- 279 T. Seitz, R. E. Millán, D. Lentz, C. Jiménez, J. Rodríguez and M. Christmann, *Org. Lett.*, 2018, **20**, 594-597, doi: 10.1021/acs.orglett.7b03706.
- 280 R. A. Medina, D. E. Goeger, P. Hills, S. L. Mooberry, N. Huang, L. I. Romero, E. Ortega-Barría, W. H. Gerwick and K. L. McPhail, *J. Am. Chem. Soc.*, 2008, **130**, 6324-6325, doi: 10.1021/ja801383f.
- 281 W. He, H.-B. Qiu, Y.-J. Chen, J. Xi and Z.-J. Yao, *Tetrahedron Lett.*, 2014, **55**, 6109-6112, doi: 10.1016/j.tetlet.2014.09.047.
- 282 G. Yao, Z. Pan, C. Wu, W. Wang, L. Fang and W. Su, *J. Am. Chem. Soc.*, 2015, **137**, 13488-13491, doi: 10.1021/jacs.5b09286.
- 283 A. Tripathi, J. Puddick, M. R. Prinsep, M. Rottmann and L. T. Tan, *J. Nat. Prod.*, 2010, **73**, 1810-1814, doi: 10.1021/np100442x.
- 284 L. Dai, B. Chen, H. Lei, Z. Wang, Y. Liu, Z. Xu and T. Ye, *Chem. Commun.*, 2012, **48**, 8697-8699, doi: 10.1039/c2cc34187e.
- 285 C. Prompanya, C. Fernandes, S. Cravo, M. M. M. Pinto, T. Dethoup, A. M. S. Silva and A. Kijjoa, *Mar. Drugs*, 2015, **13**, 1432-1450, doi: 10.3390/md13031432.
- 286 Y. Masuda, R. Tanaka, A. Ganesan and T. Doi, *J. Nat. Prod.*, 2015, **78**, 2286-2291, doi: 10.1021/acs.jnatprod.5b00643.
- 287 T. F. Molinski, K. A. Reynolds and B. I. Morinaka, *J. Nat. Prod.*, 2012, **75**, 425-431, doi: 10.1021/np200861n.
- 288 L.-P. Shao, C.-M. Si, Z.-Y. Mao, W. Zhou, T. F. Molinski, B.-G. Wei and G.-Q. Lin, *Org. Chem. Front.*, 2017, **4**, 995-1004, doi: 10.1039/c7qo00052a.
- 289 C. Festa, S. De Marino, V. Sepe, M. V. D'Auria, G. Bifulco, C. Débitus, M. Bucci, V. Vellecco and A. Zampella, *Org. Lett.*, 2011, **13**, 1532-1535, doi: 10.1021/ol200221n.
- 290 K. Kashinath, G. R. Jachak, P. R. Athawale, U. K. Marelli, R. G. Gonnade and D. S. Reddy, *Org. Lett.*, 2016, **18**, 3178-3181, doi: 10.1021/acs.orglett.6b01395.
- 291 G. R. Jachak, P. R. Athawale, H. Agarwal, M. K. Barthwal, G. Lauro, G. Bifulco and D. S. Reddy, *Org. Biomol. Chem.*, 2018, **16**, 9138-9142, doi: 10.1039/c8ob02713g.
- 292 F. He, J. Bao, X.-Y. Zhang, Z.-C. Tu, Y.-M. Shi and S.-H. Qi, *J. Nat. Prod.*, 2013, **76**, 1182-1186, doi: 10.1021/np300897v.
- 293 K. Ohsawa, M. Sugai, L. Zhang, Y. Masuda, M. Yoshida and T. Doi, *J. Org. Chem.*, 2019, **84**, 6765-6779, doi: 10.1021/acs.joc.9b00526.
- 294 J. Kobayashi, S. Takeuchi, M. Ishibashi, H. Shigemori and T. Sasaki, *Tetrahedron Lett.*, 1992, **33**, 2579-2580, doi: 10.1016/s0040-4039(00)92247-0.
- 295 A. Qureshi, C. S. Stevenson, C. L. Albert, R. S. Jacobs and D. J. Faulkner, *J. Nat. Prod.*, 1999, **62**, 1205-1207, doi: 10.1021/np990164x.
- 296 A. Bihlmeier, E. Bourcet, S. Arzt, T. Muller, S. Bräse and W. Klopffer, *J. Am. Chem. Soc.*, 2012, **134**, 2154-2160, doi: 10.1021/ja2087097.
- 297 A. Casapullo, G. Scognamiglio and G. Cimino, *Tetrahedron Lett.*, 1997, **38**, 3643-3646, doi: 10.1016/s0040-4039(97)00690-4.

- 298 S. G. Antonsen, H. Gallantree-Smith, C. H. Görbitz, T. V. Hansen, Y. H. Stenstrøm and J. M. J. Nolsøe, *Molecules*, 2017, **22**, 1720, doi: 10.3390/molecules22101720.
- 299 J. M. J. Nolsøe, S. Antonsen, C. H. Görbitz, T. V. Hansen, J. I. Nesman, Å. K. Røhr and Y. H. Stenstrøm, *J. Org. Chem.*, 2018, **83**, 15066-15076, doi: 10.1021/acs.joc.8b02318.
- 300 N.-Y. Ji, X.-M. Li, L.-P. Ding and B.-G. Wang, *Biochem. Syst. Ecol.*, 2016, **64**, 1-5, doi: 10.1016/j.bse.2015.11.010.
- 301 N.-Y. Ji, X.-M. Li and B.-G. Wang, *Helv. Chim. Acta*, 2010, **93**, 2281-2286, doi: 10.1002/hlca.201000158.
- 302 J. C. Coll, B. W. Skelton, A. H. White and A. D. Wright, *Aust. J. Chem.*, 1989, **42**, 1695-1703, doi: 10.1071/ch9891695.
- 303 X.-W. Li, S.-H. Chen, F. Ye, E. Mollo, W.-L. Zhu, H.-L. Liu and Y.-W. Guo, *Tetrahedron*, 2017, **73**, 5239-5243, doi: 10.1016/j.tet.2017.07.027.
- 304 Q. Wu, W.-T. Chen, S.-W. Li, J.-Y. Ye, X.-J. Huan, M. Gavagnin, L.-G. Yao, H. Wang, Z.-H. Miao, X.-W. Li and Y.-W. Guo, *Mar. Drugs*, 2019, **17**, 56, doi: 10.3390/md17010056.
- 305 M. Daferner, S. Mensch, T. Anke and O. Sterner, *Z. Naturforsch., C J. Biosci.*, 1999, **54**, 474-480.
- 306 G. Pak, E. Park, S. Park and J. Kim, *J. Org. Chem.*, 2020, **85**, 14246-14252, doi: 10.1021/acs.joc.0c02194.
- 307 X. Li, I. Sattler and W. Lin, *J. Antibiot.*, 2007, **60**, 191-195, doi: 10.1038/ja.2007.21.
- 308 M. T. Holmes and R. Britton, *Chem. - Eur. J.*, 2013, **19**, 12649-12652, doi: 10.1002/chem.201302352.
- 309 D. J. Shepherd, P. A. Broadwith, B. S. Dyson, R. S. Paton and J. W. Burton, *Chem. - Eur. J.*, 2013, **19**, 12644-12648, doi: 10.1002/chem.201302349.
- 310 S. Qi, S. Zhang, J. Huang, Z. Xiao, J. Wu and Q. Li, *Magn. Reson. Chem.*, 2005, **43**, 266-268, doi: 10.1002/mrc.1530.
- 311 M. Jiang, P. Sun, H. Tang, B.-S. Liu, T.-J. Li, C. Li and W. Zhang, *J. Nat. Prod.*, 2013, **76**, 764-768, doi: 10.1021/np300906b.
- 312 Y.-D. Su, C.-H. Cheng, Z.-H. Wen, Y.-C. Wu and P.-J. Sung, *Bioorg. Med. Chem. Lett.*, 2016, **26**, 3060-3063, doi: 10.1016/j.bmcl.2016.05.015.
- 313 Y. Yaoita and K. Machida, *Nat. Prod. Commun.*, 2017, **12**, 1197-1198, doi: 10.1177/1934578x1701200812.
- 314 W. Wang, Y. Liao, R. Chen, Y. Hou, W. Ke, B. Zhang, M. Gao, Z. Shao, J. Chen and F. Li, *Mar. Drugs*, 2018, **16**, 61, doi: 10.3390/md16020061.
- 315 W. Gao, C. Chai, X.-N. Li, W. Sun, F. Li, C. Chen, J. Wang, H. Zhu, Y. Wang, Z. Hu and Y. Zhang, *Tetrahedron Lett.*, 2020, **61**, 151516, doi: 10.1016/j.tetlet.2019.151516.
- 316 N. Tsuji and K. Nagashima, *Tetrahedron*, 1970, **26**, 5201-5213, doi: 10.1016/S0040-4020(01)98729-0.
- 317 A. Präg, B. A. Grüning, M. Häckh, S. Lüdeke, M. Wilde, A. Luzhetskyy, M. Richter, M. Luzhetska, S. Günther and M. Müller, *J. Am. Chem. Soc.*, 2014, **136**, 6195-6198, doi: 10.1021/ja501630w.
- 318 B. C. M. Potts, D. J. Faulkner, J. A. Chan, G. C. Simolike, P. Offen, M. E. Hemling and T. A. Francis, *J. Am. Chem. Soc.*, 1991, **113**, 6321-6322, doi: 10.1021/ja00016a087.
- 319 H. Fuwa, K. Sekine and M. Sasaki, *Org. Lett.*, 2013, **15**, 3970-3973, doi: 10.1021/ol4017518.
- 320 H. Fuwa, T. Muto, K. Sekine and M. Sasaki, *Chem. - Eur. J.*, 2014, **20**, 1848-1860, doi: 10.1002/chem.201303713.
- 321 Q.-X. Wu, M. S. Crews, M. Draskovic, J. Sohn, T. A. Johnson, K. Tenney, F. A. Valeriote, X.-J. Yao, L. F. Bjeldanes and P. Crews, *Org. Lett.*, 2010, **12**, 4458-4461, doi: 10.1021/ol101396n.
- 322 J.-C. Zhao, S.-M. Yu, Y. Liu and Z.-J. Yao, *Org. Lett.*, 2013, **15**, 4300-4303, doi: 10.1021/ol4015706.
- 323 J.-C. Zhao, S.-M. Yu, H.-B. Qiu and Z.-J. Yao, *Tetrahedron*, 2014, **70**, 3197-3210, doi: 10.1016/j.tet.2014.03.061.
- 324 M. Tsuda, Y. Kasai, K. Komatsu, T. Sone, M. Tanaka, Y. Mikami and J. Kobayashi, *Org. Lett.*, 2004, **6**, 3087-3089, doi: 10.1021/ol048900y.
- 325 T. Mugishima, M. Tsuda, Y. Kasai, H. Ishiyama, E. Fukushi, J. Kawabata, M. Watanabe, K. Akao and J. Kobayashi, *J. Org. Chem.*, 2005, **70**, 9430-9435, doi: 10.1021/jo051499o.
- 326 Z. Bian, C. C. Marvin and S. F. Martin, *J. Am. Chem. Soc.*, 2013, **135**, 10886-10889, doi: 10.1021/ja405547f.
- 327 Z. Bian, C. C. Marvin, M. Pettersson and S. F. Martin, *J. Am. Chem. Soc.*, 2014, **136**, 14184-14192, doi: 10.1021/ja5074646.
- 328 K. Kong, J. A. Enquist, M. E. McCallum, G. M. Smith, T. Matsumaru, E. Menhaji-Klotz and J. L. Wood, *J. Am. Chem. Soc.*, 2013, **135**, 10890-10893, doi: 10.1021/ja405548b.
- 329 S. P. B. Ovenden, G. Sberna, R. M. Tait, H. G. Wildman, R. Patel, B. Li, K. Steffy, N. Nguyen and B. M. Meurer-Grimes, *J. Nat. Prod.*, 2004, **67**, 2093-2095, doi: 10.1021/np0497494.

- 330 F.-Y. Du, X.-M. Li, C.-S. Li, Z. Shang and B.-G. Wang, *Bioorg. Med. Chem. Lett.*, 2012, **22**, 4650-4653, doi: 10.1016/j.bmcl.2012.05.088.
- 331 P. Lorenzo, R. Álvarez and Á. R. de Lera, *J. Nat. Prod.*, 2014, **77**, 421-423, doi: 10.1021/np400969u.
- 332 J. W. Kim, S.-K. Ko, S. Son, K.-S. Shin, I.-J. Ryoo, Y.-S. Hong, H. Oh, B. Y. Hwang, H. Hirota, S. Takahashi, B. Y. Kim, H. Osada, J.-H. Jang and J. S. Ahn, *Bioorg. Med. Chem. Lett.*, 2015, **25**, 5398-5401, doi: 10.1016/j.bmcl.2015.09.026.
- 333 S. Chen, J. Wang, X. Lin, B. Zhao, X. Wei, G. Li, K. Kaliaperumal, S. Liao, B. Yang, X. Zhou, J. Liu, S. Xu and Y. Liu, *Org. Lett.*, 2016, **18**, 3650-3653, doi: 10.1021/acs.orglett.6b01699.
- 334 J. Chen, J. Li, L. Zhu, X. Peng, Y. Feng, Y. Lu, X. Hu, J. Liang, Q. Zhao and Z. Wang, *Org. Chem. Front.*, 2018, **5**, 3402-3405, doi: 10.1039/c8qo00949j.
- 335 Z. Cheng, L. Lou, D. Liu, X. Li, P. Proksch, S. Yin and W. Lin, *J. Nat. Prod.*, 2016, **79**, 2941-2952, doi: 10.1021/acs.jnatprod.6b00801.
- 336 J.-F. Wu and P.-Q. Huang, *Chin. Chem. Lett.*, 2020, **31**, 61-63, doi: 10.1016/j.ccl.2019.06.043.
- 337 R. W. Dunlop, P. T. Murphy and R. J. Wells, *Aust. J. Chem.*, 1979, **32**, 2735-2739, doi: 10.1071/ch9792735.
- 338 J. V. Leary, R. Kfir, J. J. Sims and D. W. Fulbright, *Mutat. Res., Genet. Toxicol. Test.*, 1979, **68**, 301-305, doi: 10.1016/0165-1218(79)90162-9.
- 339 R. T. C. Brownlee, J. G. Hall and J. A. Reiss, *Org. Magn. Reson.*, 1983, **21**, 544-547, doi: 10.1002/omr.1270210905.
- 340 D. B. Stierle and J. J. Sims, *Tetrahedron Lett.*, 1984, **25**, 153-156, doi: 10.1016/s0040-4039(00)99827-7.
- 341 S. Naylor, L. V. Manes and P. Crews, *J. Nat. Prod.*, 1985, **48**, 72-75, doi: 10.1021/np50037a013.
- 342 V. Kesternich, R. Martinez, E. Gutierrez, K. Kallesteros and H. Mansilla, *Bol. Soc. Chil. Quim.*, 1997, **42**, 105-108.
- 343 G. W. Gribble, Naturally Occurring Organohalogen Compounds—A Comprehensive Update; Series Fortschritte der Chemie organischer Naturstoffe Progress in the Chemistry of Organic Natural Products, Springer-Verlag/Wien, New York, NY, USA, 2010, Vol. 91.
- 344 M. A. Timmers, D. A. Dias and S. Urban, *Mar. Drugs*, 2012, **10**, 2089-2102, doi: 10.3390/md10092089.
- 345 J. Y. Cho, P. G. Williams, H. C. Kwon, P. R. Jensen and W. Fenical, *J. Nat. Prod.*, 2007, **70**, 1321-1328, doi: 10.1021/np070101b.
- 346 U. Pal, S. Ranatunga, Y. Ariyaratna and J. R. Del Valle, *Org. Lett.*, 2009, **11**, 5298-5301, doi: 10.1021/ol902251c.
- 347 S. Ranatunga, C.-H. A. Tang, C.-C. A. Hu and J. R. Del Valle, *J. Org. Chem.*, 2012, **77**, 9859-9864, doi: 10.1021/jo301723y.
- 348 J. W. Cha, J.-S. Park, T. Sim, S.-J. Nam, H. C. Kwon, J. R. Del Valle and W. Fenical, *J. Nat. Prod.*, 2012, **75**, 1648-1651, doi: 10.1021/np3003854.
- 349 R. Kazlauskas, P. T. Murphy, R. J. Wells and A. J. Blackman, *Aust. J. Chem.*, 1982, **35**, 113-120, doi: 10.1071/ch9820113.
- 350 T. O. Ronson, M. J. Burns, M. H. H. Voelkel, K. J. Evans, J. M. Lynam, R. J. K. Taylor and I. J. S. Fairlamb, *Chem. - Eur. J.*, 2015, **21**, 18905-18909, doi: 10.1002/chem.201504089.
